# Supplementary material for: Metal-mediated aminocatalysis provides mild conditions: Enantioselective Michael addition mediated by primary amino catalysts and alkali-metal ions
Source: publisher site journal article supplement (doi:10.3762/bjoc.9.18), 2013-01-23
Supplement: Additional file 1 [file 1860-5397-9-18-S1.pdf]

Supporting Information  
for

**Metal-mediated aminocatalysis provides mild  
conditions: Enantioselective Michael addition  
mediated by primary amino catalysts and alkali!  
metal ions**

Matthias Leven, Jörg M. Neudörfl<sup>†</sup>, and Bernd Goldfuss\*

Address: Department of Chemistry, Universität zu Köln, Greinstrasse 4, D-50939  
Köln, Germany, Fax: +49(0)221-470-5057

Email: Bernd Goldfuss - goldfuss@uni-koeln.de

\*Corresponding author

<sup>†</sup>X-ray analysis

**Spectra of precatalysts and crystallographic data for compound 5.**

## NMR spectroscopy

**General:** Deuterated solvents were purchased from Deutero GmbH, Kastellaun (Germany) (chloroform-d and DMSO-d<sub>6</sub>) and Sigma Aldrich (D<sub>2</sub>O). Chloroform-d was dried over molecular sieves. NMR spectra for characterization of compounds were recorded with a Bruker DPX 300 spectrometer (<sup>1</sup>H frequency 300.13 MHz).

<sup>1</sup>H -and <sup>13</sup>C-NMR spectra of compound **5** (D<sub>2</sub>O):

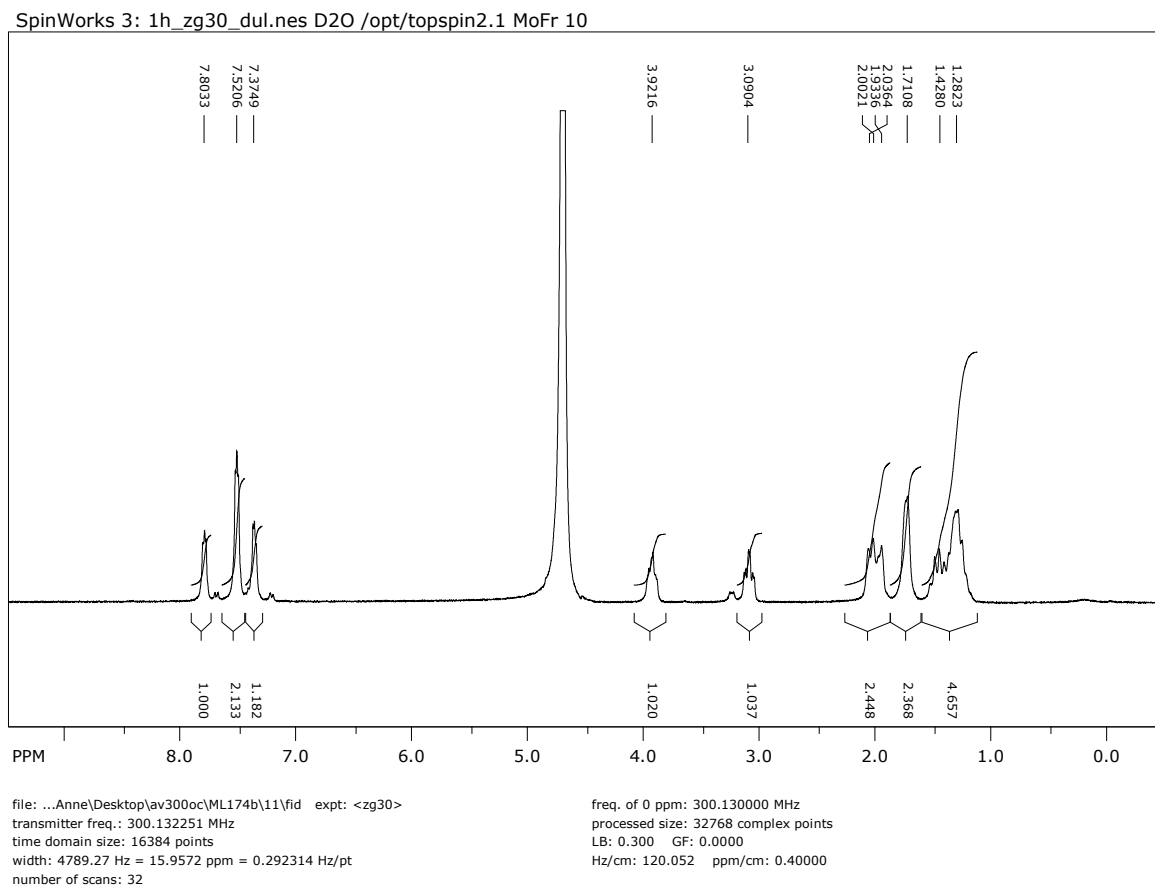

SpinWorks 3: 13c\_apt\_dul.nes D2O /opt/topspin SaSo 29

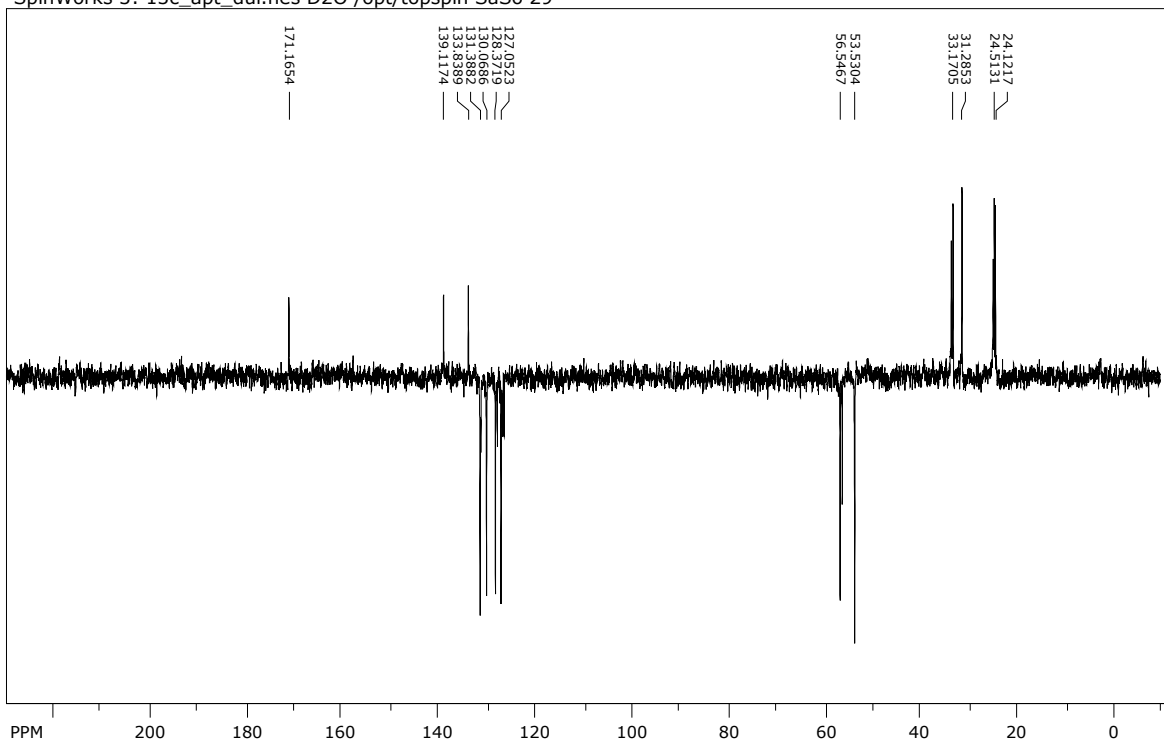

file: ...dpx300\ML169Dach\_amid\_so3h\10\fid expt: <apt>  
transmitter freq.: 75.476050 MHz  
time domain size: 32768 points  
width: 18115.94 Hz = 240.0224 ppm = 0.552855 Hz/pt  
number of scans: 512

freq. of 0 ppm: 75.467749 MHz  
processed size: 32768 complex points  
LB: 3.000 GF: 0.0000  
Hz/cm: 724.638 ppm/cm: 9.60090

$^1\text{H}$  and  $^{13}\text{C}$  NMR spectra of compound **6** (DMSO- $d_6$ ):

SpinWorks 3: 13c\_apt\_dul.nes DMSO /opt/topspin MoFr 5

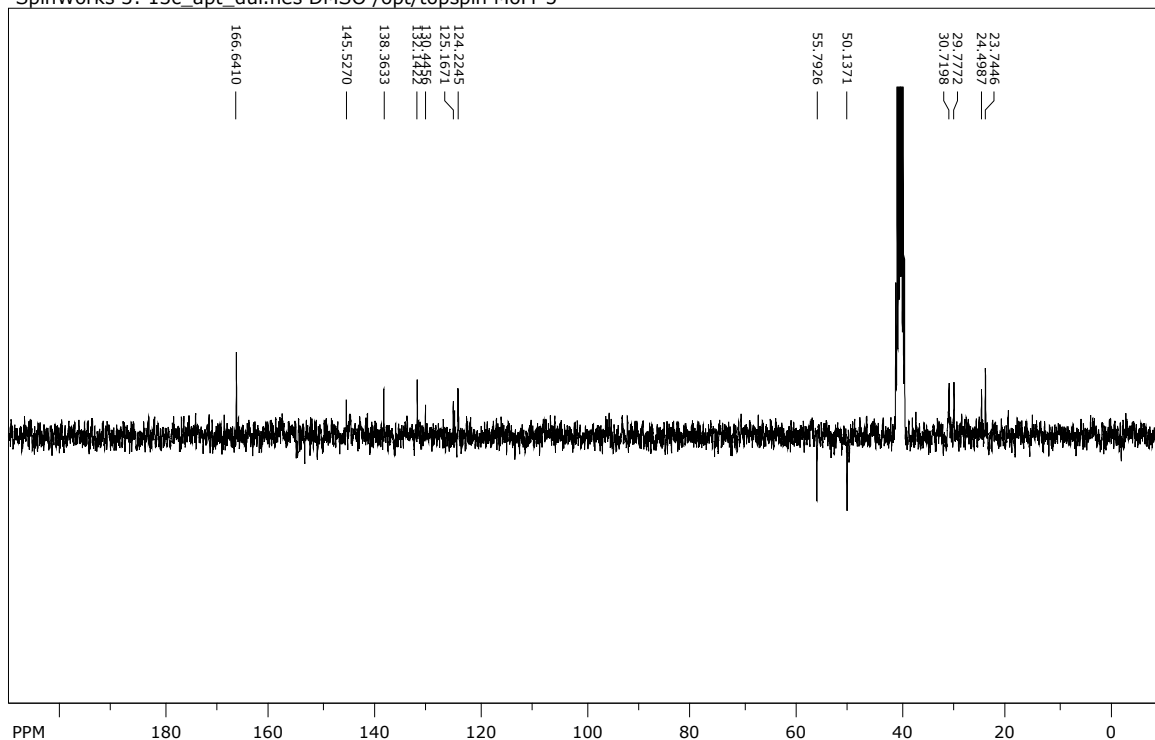

file: ...300\ML212b\_Br4\_Dach\_SO3H\_uk\10\fid expt: <apt>  
 transmitter freq.: 75.476050 MHz  
 time domain size: 32768 points  
 width: 18115.94 Hz = 240.0224 ppm = 0.552855 Hz/pt  
 number of scans: 512

freq. of 0 ppm: 75.467749 MHz  
 processed size: 32768 complex points  
 LB: 3.000 GF: 0.0000  
 Hz/cm: 664.116 ppm/cm: 8.79903

SpinWorks 3: 1h\_zg30\_dul.nes DMSO /opt/topspin MoFr 5

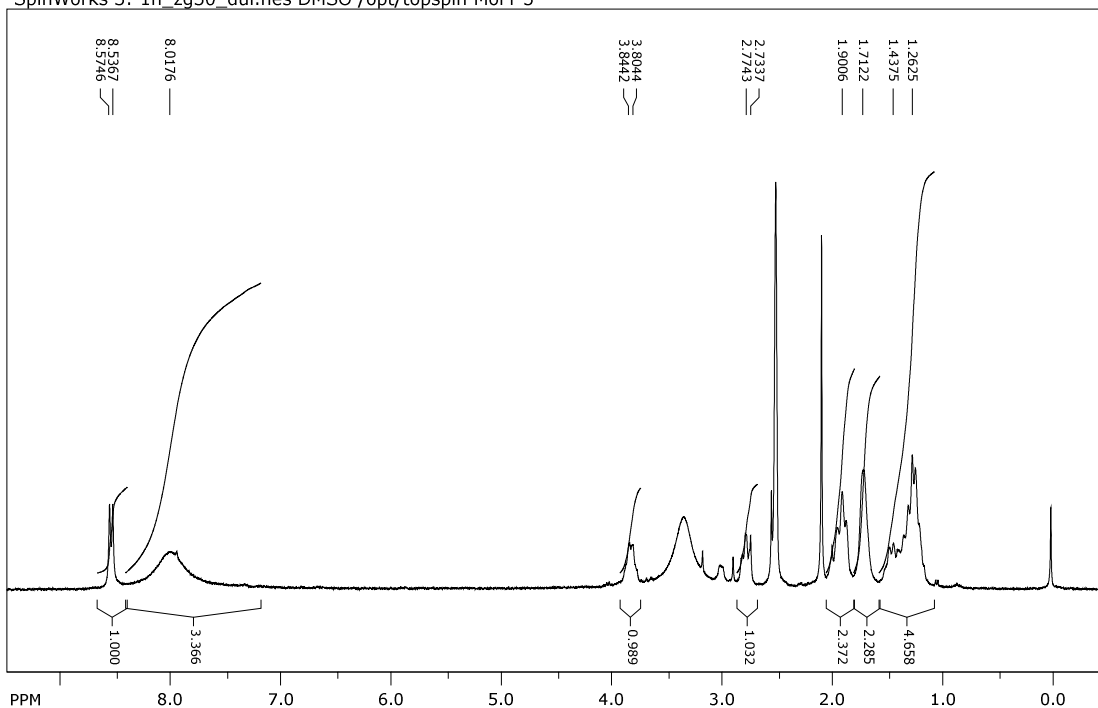

file: ...300\ML212b\_Br4\_Dach\_SO3H\_uk\11\fid expt: <zg30>  
 transmitter freq.: 300.132251 MHz  
 time domain size: 16384 points  
 width: 4789.27 Hz = 15.9572 ppm = 0.292314 Hz/pt  
 number of scans: 32

freq. of 0 ppm: 300.130000 MHz  
 processed size: 32768 complex points  
 LB: 0.300 GF: 0.0000  
 Hz/cm: 120.052 ppm/cm: 0.40000

$^1\text{H}$  and  $^{13}\text{C}$  NMR spectra of compound **7** ( $\text{CDCl}_3$ ):

SpinWorks 3: 1h\_zg30\_dul.nes  $\text{CDCl}_3$  /opt/topspin2.1 MoFr 5

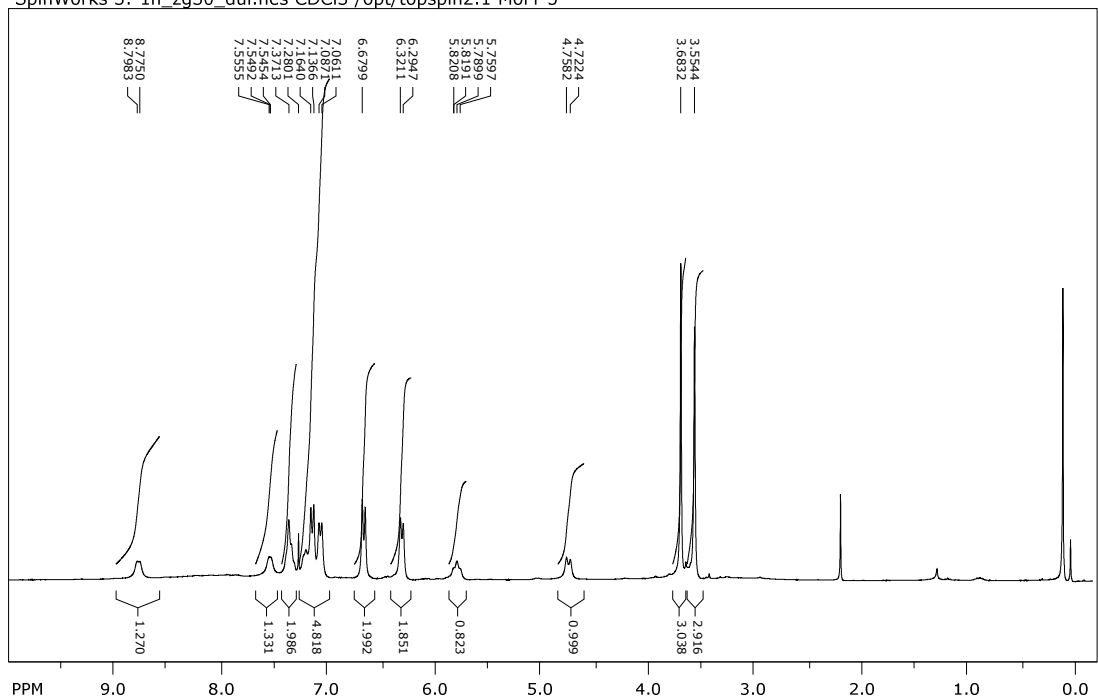

file: ...Anne\Desktop\av300oc\ML174c\11\fid exp: <zg30>  
 transmitter freq.: 300.132251 MHz  
 time domain size: 16384 points  
 width: 4789.27 Hz = 15.9572 ppm = 0.292314 Hz/pt  
 number of scans: 32

freq. of 0 ppm: 300.130000 MHz  
 processed size: 32768 complex points  
 LB: 0.300 GF: 0.0000  
 Hz/cm: 122.461 ppm/cm: 0.40802

SpinWorks 3: 13c\_deptqgp\_dul  $\text{CDCl}_3$  /opt/topspin2.1 MoFr 5

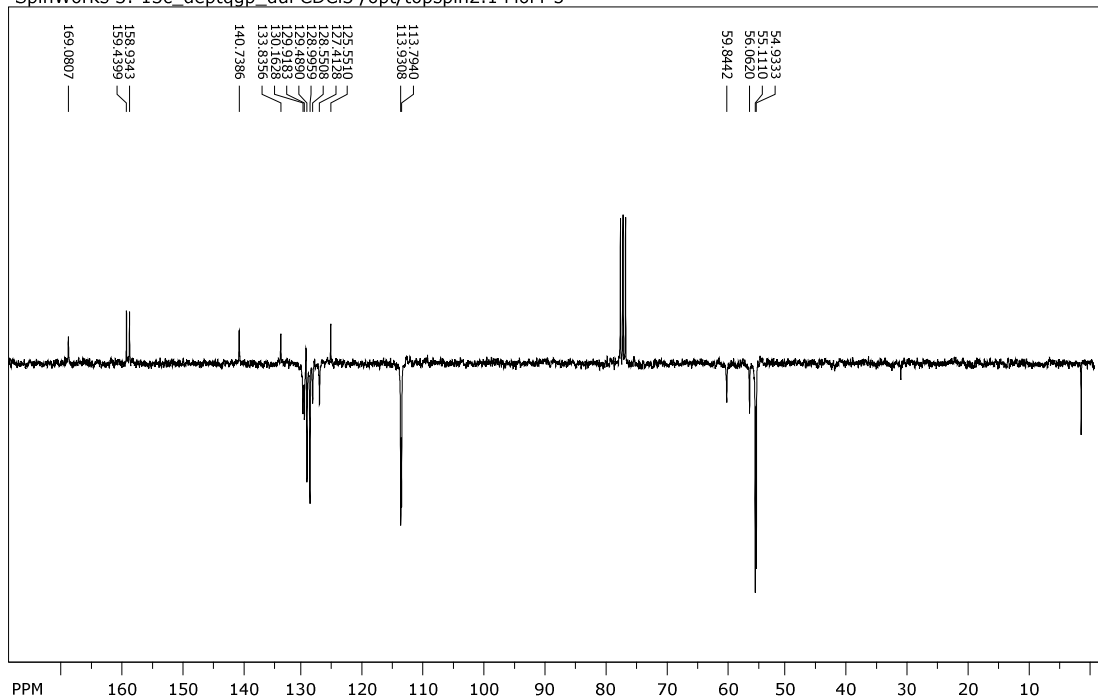

file: ...Anne\Desktop\av300oc\ML174c\10\fid exp: <deptqgp>  
 transmitter freq.: 75.476050 MHz  
 time domain size: 32768 points  
 width: 18115.94 Hz = 240.0224 ppm = 0.552855 Hz/pt  
 number of scans: 360

freq. of 0 ppm: 75.467749 MHz  
 processed size: 32768 complex points  
 LB: 3.000 GF: 0.0000  
 Hz/cm: 543.944 ppm/cm: 7.20684

$^1\text{H}$  and  $^{13}\text{C}$  NMR spectra of compound **8** (DMSO- $d_6$ ):

SpinWorks 3: 13c\_apt\_dul.nes DMSO /opt/topspin MoFr 1

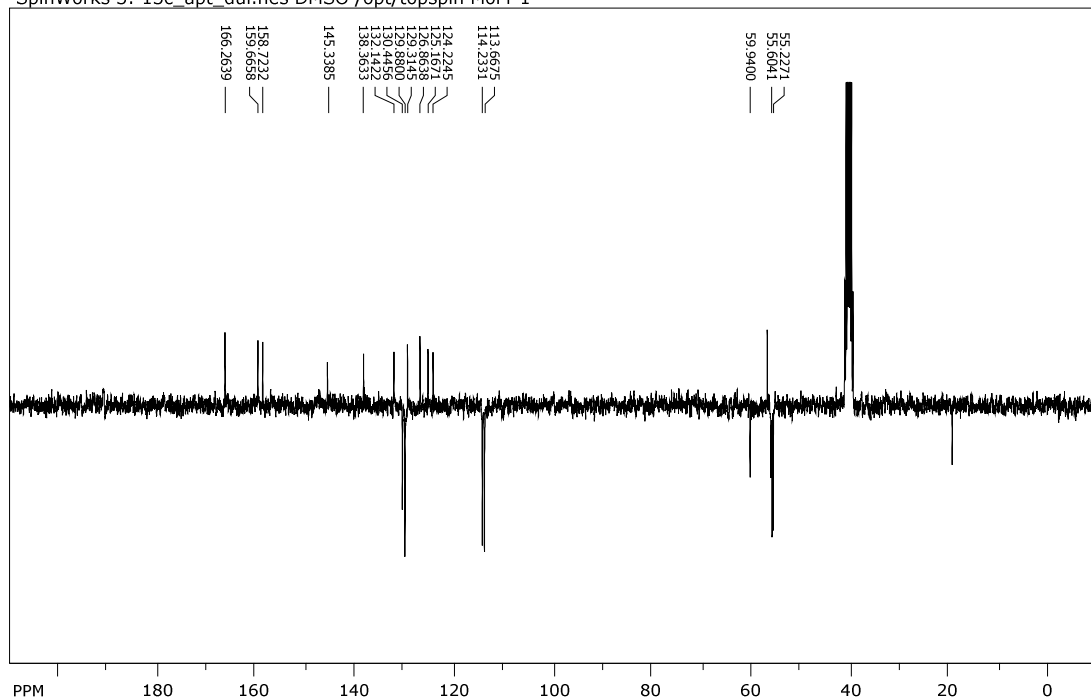

file: ...n\Anne\Desktop\dpx300\ML210\10\fid expt: <apt>  
 transmitter freq.: 75.476050 MHz  
 time domain size: 32768 points  
 width: 18115.94 Hz = 240.0224 ppm = 0.552855 Hz/pt  
 number of scans: 512

freq. of 0 ppm: 75.467749 MHz  
 processed size: 32768 complex points  
 LB: 3.000 GF: 0.0000  
 Hz/cm: 664.116 ppm/cm: 8.79903

SpinWorks 3: 1h\_zg30\_dul.nes DMSO /opt/topspin MoFr 1

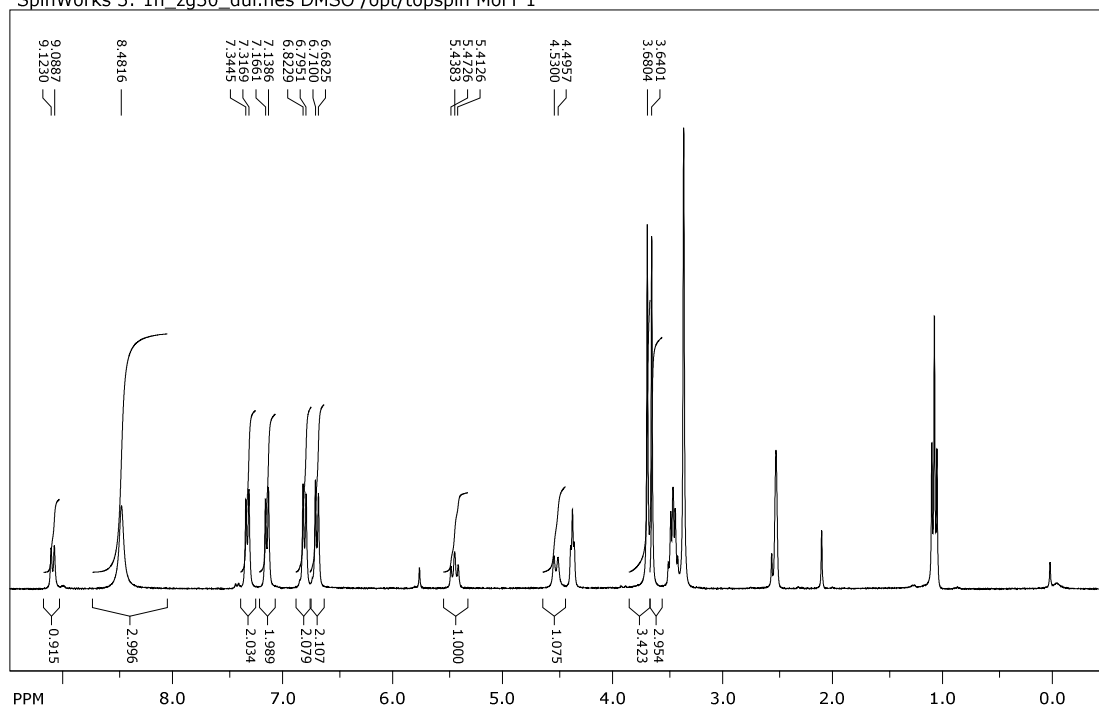

file: ...n\Anne\Desktop\dpx300\ML210\11\fid expt: <zg30>  
 transmitter freq.: 300.132251 MHz  
 time domain size: 16384 points  
 width: 4789.27 Hz = 15.9572 ppm = 0.292314 Hz/pt  
 number of scans: 32

freq. of 0 ppm: 300.130000 MHz  
 processed size: 32768 complex points  
 LB: 0.300 GF: 0.0000  
 Hz/cm: 120.052 ppm/cm: 0.40000

**4-hydroxy-3-(3-oxo-1-phenylbutyl)cumarin (warfarin/ $\text{CDCl}_3$ )**

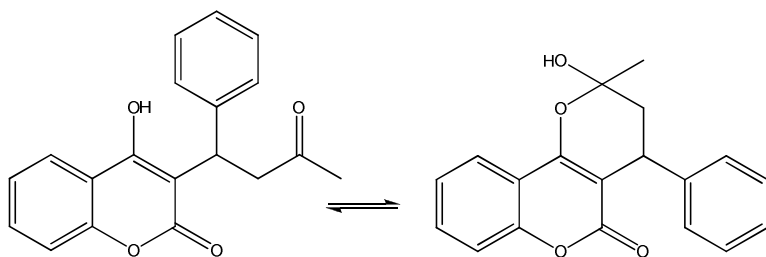

SpinWorks 3: 13c\_apt\_dul.nes  $\text{CDCl}_3$  /opt/topspin SaSo 16

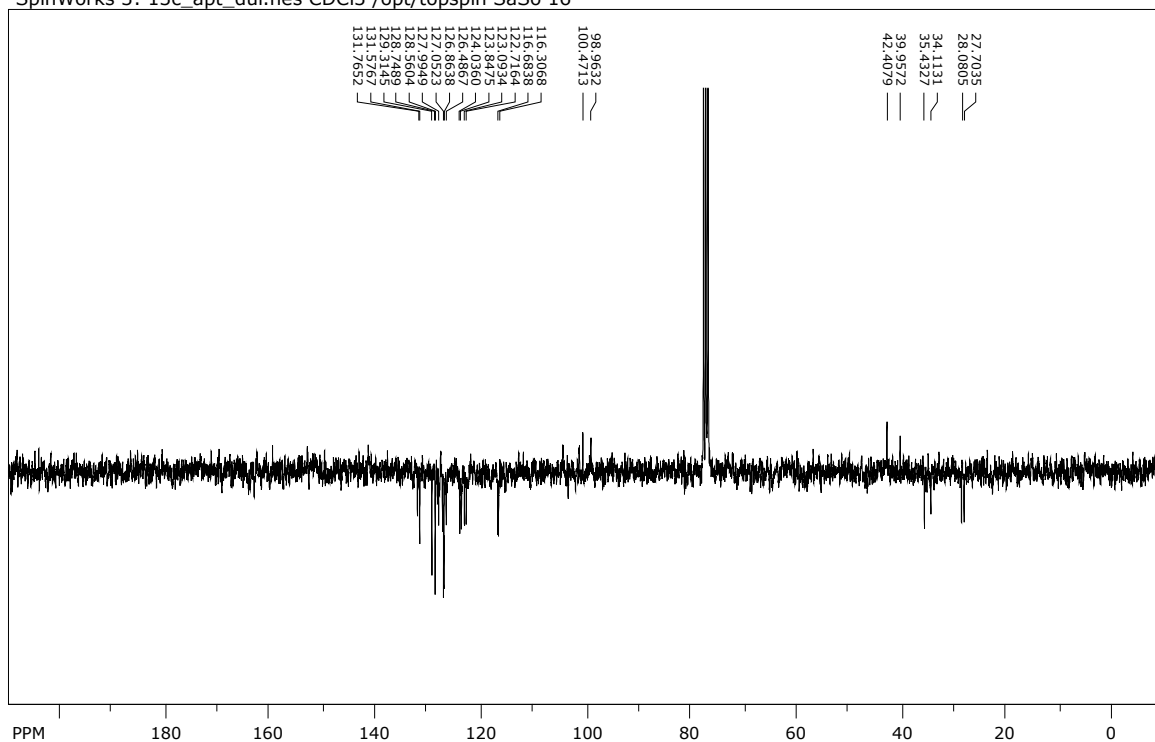

file: ...n\Anne\Desktop\dpx300\ML198\10\fid expt: <apt>  
 transmitter freq.: 75.476050 MHz  
 time domain size: 32768 points  
 width: 18115.94 Hz = 240.0224 ppm = 0.552855 Hz/pt  
 number of scans: 512

freq. of 0 ppm: 75.467749 MHz  
 processed size: 32768 complex points  
 LB: 3.000 GF: 0.0000  
 Hz/cm: 664.116 ppm/cm: 8.79903

SpinWorks 3: 1h\_zg30\_dul.nes CDCl3 /opt/topspin SaSo 16

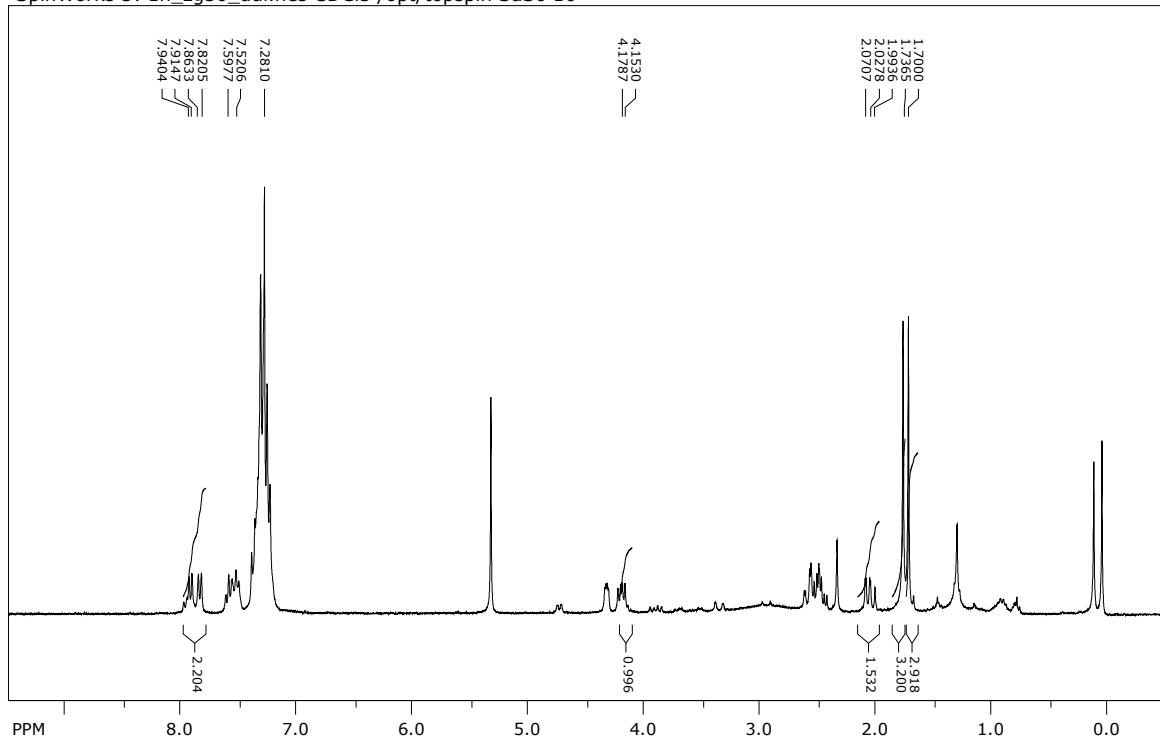

file: ...n\Anne\Desktop\dpx300\ML198\11\fid exp: <zg30>  
transmitter freq.: 300.132251 MHz  
time domain size: 16384 points  
width: 4789.27 Hz = 15.9572 ppm = 0.292314 Hz/pt  
number of scans: 32

freq. of 0 ppm: 300.130000 MHz  
processed size: 32768 complex points  
LB: 0.300 GF: 0.0000  
Hz/cm: 120.052 ppm/cm: 0.40000

#### 4-hydroxy-3-(3-oxocyclohexyl)cumarin (CDCl<sub>3</sub>)

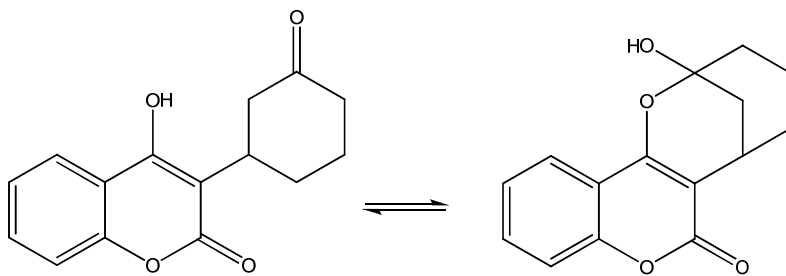



SpinWorks 3: 13c\_apt\_dul.nes CDCl3 /opt/topspin MoFr 2

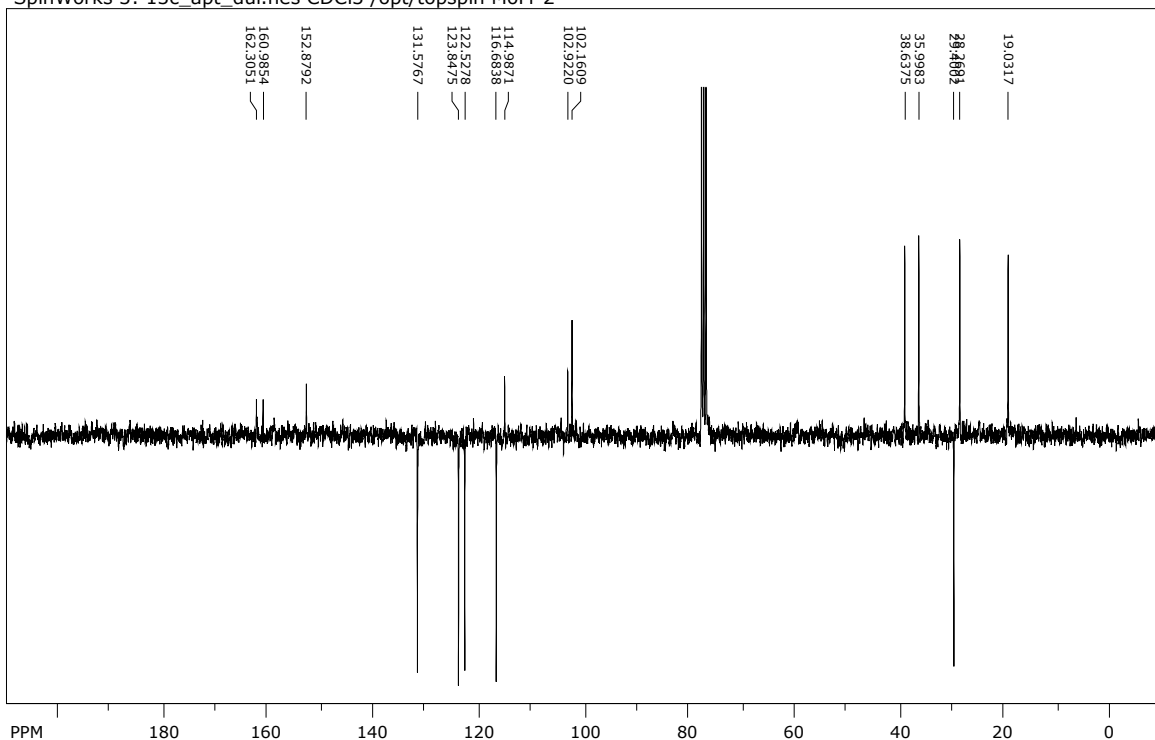

file: ...n\Anne\Desktop\dpx300\ML202\10\fid exp: <apt>  
 transmitter freq.: 75.476050 MHz  
 time domain size: 32768 points  
 width: 18115.94 Hz = 240.0224 ppm = 0.552855 Hz/pt  
 number of scans: 512

freq. of 0 ppm: 75.467749 MHz  
 processed size: 32768 complex points  
 LB: 3.000 GF: 0.0000  
 Hz/cm: 664.116 ppm/cm: 8.79903

SpinWorks 3: 1h\_zg30\_dul.nes CDCl3 /opt/topspin MoFr 2

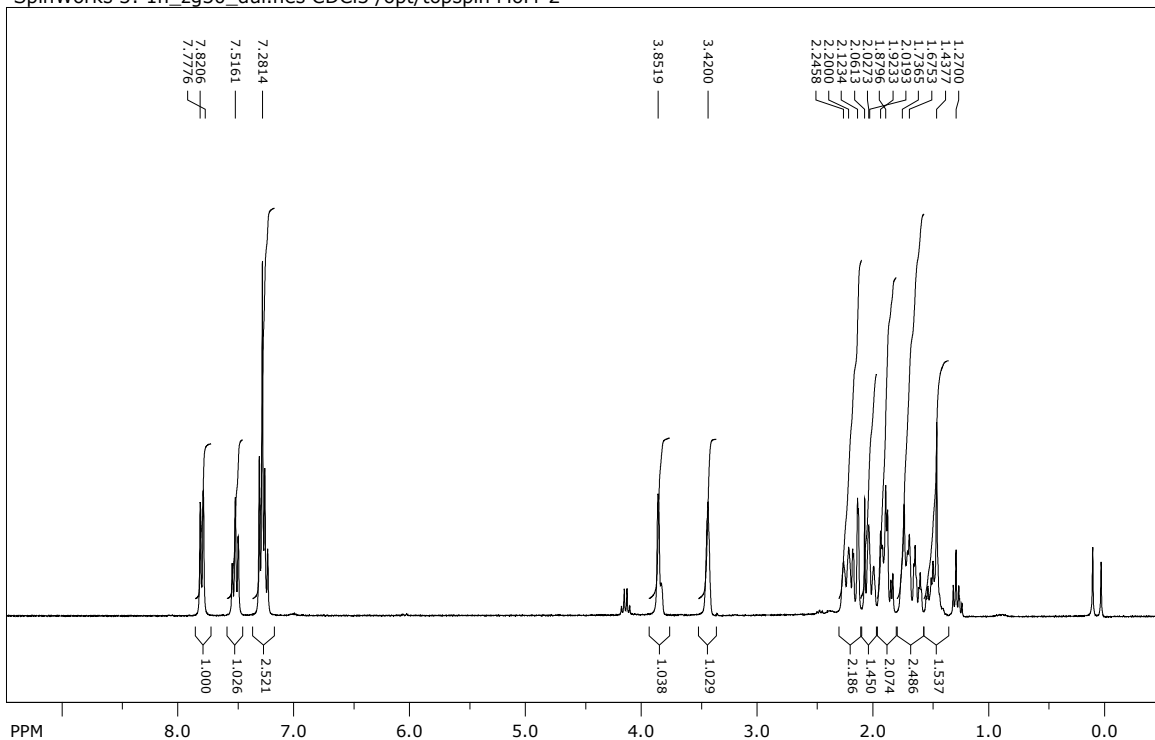

file: ...n\Anne\Desktop\dpx300\ML202\11\fid exp: <zg30>  
 transmitter freq.: 300.132251 MHz  
 time domain size: 16384 points  
 width: 4789.27 Hz = 15.9572 ppm = 0.292314 Hz/pt  
 number of scans: 32

freq. of 0 ppm: 300.130000 MHz  
 processed size: 32768 complex points  
 LB: 0.300 GF: 0.0000  
 Hz/cm: 120.052 ppm/cm: 0.40000

# 4-hydroxy-3-(3-oxocycloheptyl)cumarin ( $\text{CDCl}_3$ )

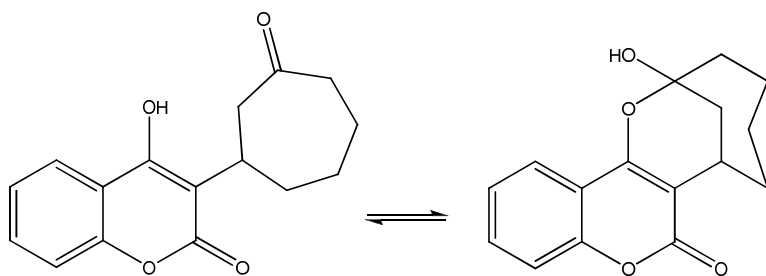

SpinWorks 3: 13c\_apt\_dul.nes  $\text{CDCl}_3$  /opt/topspin SaSo 24

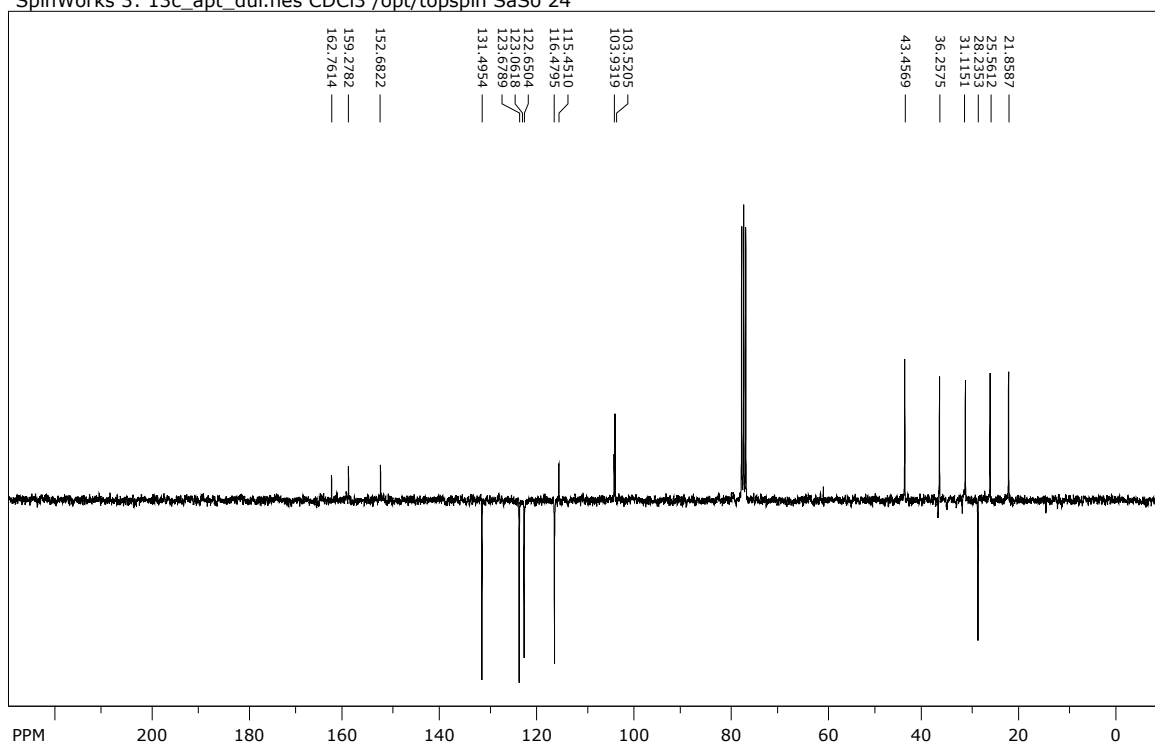

file: ...n\Anne\Desktop\dpx300\ML214\10\fid exp: <apt>  
 transmitter freq.: 75.476050 MHz  
 time domain size: 32768 points  
 width: 18115.94 Hz = 240.0224 ppm = 0.552855 Hz/pt  
 number of scans: 512

freq. of 0 ppm: 75.467749 MHz  
 processed size: 32768 complex points  
 LB: 3.000 GF: 0.0000  
 Hz/cm: 724.638 ppm/cm: 9.60090

SpinWorks 3: 1h\_zg30\_dul.nes CDCl3 /opt/topspin SaSo 24

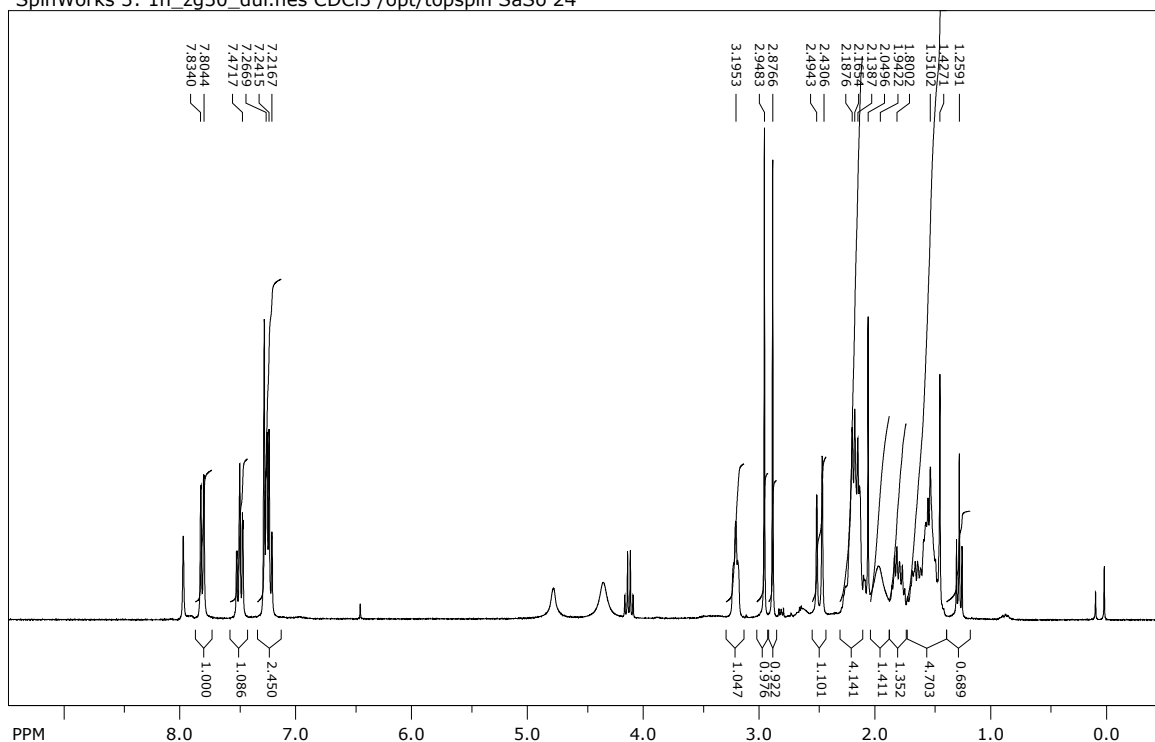

file: ...n\Anne\Desktop\dpx300\ML214\11\fid exp: <zg30>  
transmitter freq.: 300.132251 MHz  
time domain size: 16384 points  
width: 4789.27 Hz = 15.9572 ppm = 0.292314 Hz/pt  
number of scans: 32

freq. of 0 ppm: 300.130000 MHz  
processed size: 32768 complex points  
LB: 0.300 GF: 0.0000  
Hz/cm: 120.052 ppm/cm: 0.40000

## ESI-MS

High-resolution MS was carried out with ESI-LC/MS in positive mode with a resolution of 30,000.

ESI-MS measurements for detection of intermediates from the catalytic process were carried out in positive mode employing a Bruker Daltonics Esquire 3000 plus. The flow rate was adjusted at 9  $\mu$ l/min and HPLC grade methanol was used as eluent. Samples were prepared as follows: 0.02 mmol of compound **8**, were dissolved in a 0.1 M solution of alkali-metal hydroxide in methanol, 0.2 ml. The solution was evaporated and the residue was dissolved in 0.5 ml absolute THF. 0.14 mmol cyclohexenon was added subsequently and the solution was stirred for 10 min at room temperature prior to measurements.

**Acquisition Parameter**

|                   |             |              |           |                          |          |
|-------------------|-------------|--------------|-----------|--------------------------|----------|
| Ion Source Type   | ESI         | Ion Polarity | Positive  | Alternating Ion Polarity | off      |
| Mass Range Mode   | Std/Normal  | Scan Begin   | 100 m/z   | Scan End                 | 2800 m/z |
| Capillary Exit    | 220.0 Volt  | Skim 1       | 40.0 Volt | Trap Drive               | 78.0     |
| Accumulation Time | 624 $\mu$ s | Averages     | 7 Spectra | Auto MS/MS               | off      |

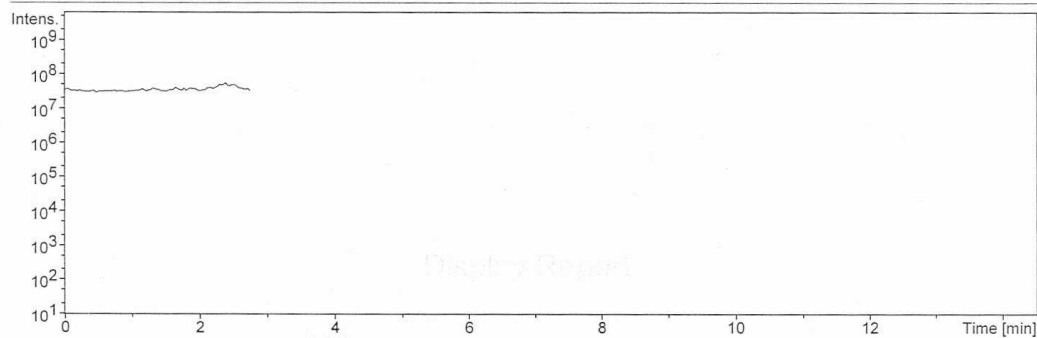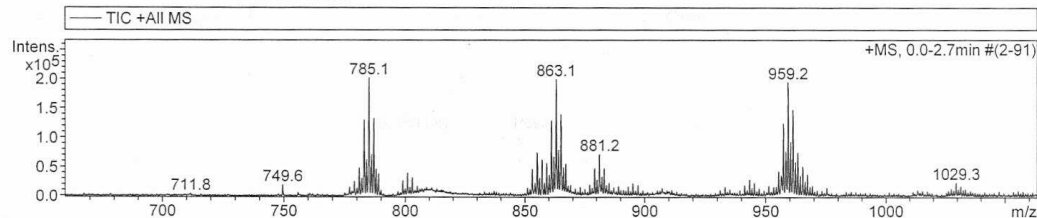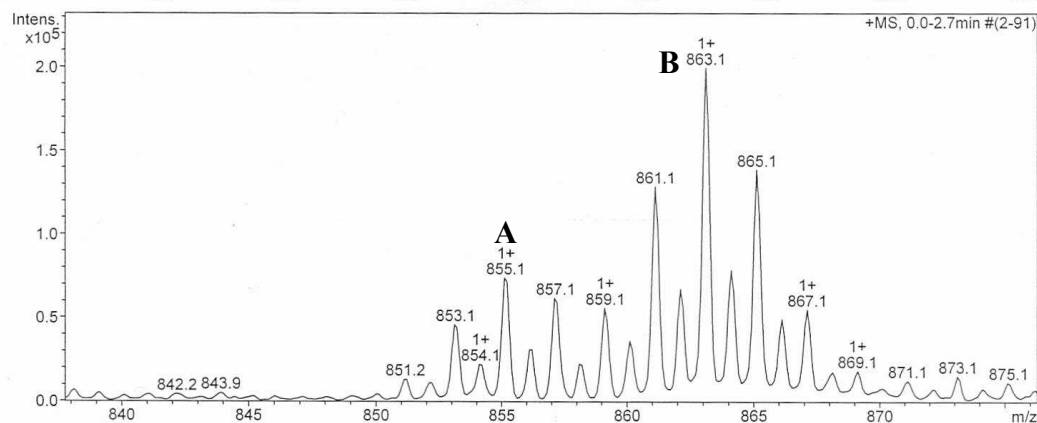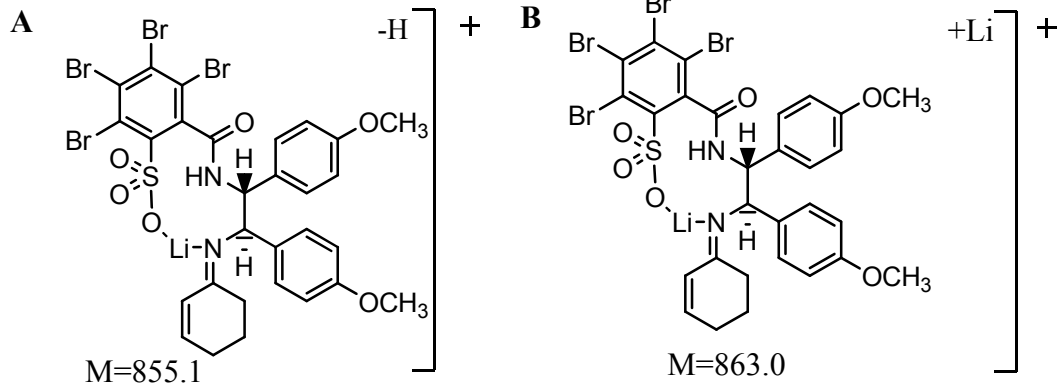

## X-ray crystallography

Compound **5** was crystallized from methanol. The colourless crystals were used for X-ray crystallography subsequently.

```
TITL hk171 100k .3 .1 .1
CELL 0.71073 8.4485 12.1533 13.6221 90.000 90.000 90.000
ZERR 4 0.0002 0.0004 0.0005 0.000 0.000 0.000
LATT -1
SYMM 0.50000 - X , - Y , 0.50000 + Z
SYMM 0.50000 + X , 0.50000 - Y , - Z
SYMM - X , 0.50000 + Y , 0.50000 - Z
SFAC C H N O S
UNIT 52 72 8 16 4
OMIT -2 54
TEMP -173
L.S. 5
FMAP 2
PLAN 20
ACTA
BOND $H
CONF
WGHT 0.038700
FVAR 0.38611
S1 5 0.381274 0.471094 -0.043850 11.00000 0.01696
0.01543 =
0.01512 -0.00198 0.00171 -0.00101
O1 4 0.445155 0.535427 -0.123325 11.00000 0.03007
0.02089 =
0.01913 -0.00136 0.00736 -0.00407
O2 4 0.256143 0.394442 -0.071901 11.00000 0.02066
0.01704 =
0.01950 -0.00325 -0.00208 -0.00198
O3 4 0.504630 0.414400 0.013955 11.00000 0.01443
0.02145 =
0.02342 -0.00198 0.00052 0.00278
O4 4 0.012752 0.379221 0.140492 11.00000 0.01478
0.01901 =
0.02307 0.00047 -0.00016 -0.00231
N1 3 0.275801 0.347414 0.157103 11.00000 0.01380
0.01424 =
0.01803 0.00090 0.00053 -0.00202
N2 3 0.301494 0.180813 0.004168 11.00000 0.01649
0.01447 =
0.02400 -0.00184 0.00209 -0.00046
C1 1 0.290422 0.565405 0.038972 11.00000 0.01485
0.01743 =
0.01469 -0.00087 -0.00216 0.00110
C2 1 0.189975 0.530536 0.115147 11.00000 0.01424
0.01900 =
0.01364 0.00085 -0.00315 0.00077
C3 1 0.152109 0.412059 0.137452 11.00000 0.01689
0.01767 =
0.01166 -0.00223 0.00075 0.00061
C4 1 0.268908 0.230022 0.179523 11.00000 0.01711
0.01322 =
0.02183 0.00383 -0.00092 -0.00006
C5 1 0.366211 0.164974 0.104886 11.00000 0.01317
0.01608 =
0.02545 0.00021 -0.00189 -0.00044
```

|           |   |          |           |           |          |         |
|-----------|---|----------|-----------|-----------|----------|---------|
| C6        | 1 | 0.367984 | 0.042368  | 0.129038  | 11.00000 | 0.01784 |
| 0.01455 = |   |          |           |           |          |         |
|           |   | 0.04155  | -0.00090  | -0.00397  | 0.00150  |         |
| C7        | 1 | 0.426290 | 0.021746  | 0.232825  | 11.00000 | 0.02041 |
| 0.01885 = |   |          |           |           |          |         |
|           |   | 0.05227  | 0.01143   | -0.01168  | 0.00129  |         |
| C8        | 1 | 0.330330 | 0.085317  | 0.307798  | 11.00000 | 0.02765 |
| 0.02847 = |   |          |           |           |          |         |
|           |   | 0.03390  | 0.01400   | -0.00850  | -0.00321 |         |
| C9        | 1 | 0.328798 | 0.208603  | 0.283500  | 11.00000 | 0.02834 |
| 0.02523 = |   |          |           |           |          |         |
|           |   | 0.02304  | 0.00508   | -0.00438  | 0.00028  |         |
| C10       | 1 | 0.119052 | 0.609313  | 0.175284  | 11.00000 | 0.01712 |
| 0.02027 = |   |          |           |           |          |         |
|           |   | 0.01925  | -0.00038  | -0.00003  | 0.00317  |         |
| C11       | 1 | 0.146652 | 0.721039  | 0.160899  | 11.00000 | 0.02556 |
| 0.01917 = |   |          |           |           |          |         |
|           |   | 0.02257  | -0.00471  | -0.00024  | 0.00505  |         |
| C12       | 1 | 0.245826 | 0.754252  | 0.085654  | 11.00000 | 0.02826 |
| 0.01494 = |   |          |           |           |          |         |
|           |   | 0.02682  | -0.00058  | -0.00248  | -0.00047 |         |
| C13       | 1 | 0.318034 | 0.677167  | 0.024778  | 11.00000 | 0.02023 |
| 0.01750 = |   |          |           |           |          |         |
|           |   | 0.01949  | 0.00041   | -0.00008  | -0.00101 |         |
| H1        | 2 | 0.265650 | 0.014397  | 0.121651  | 11.00000 | 0.03178 |
| H2        | 2 | 0.365202 | 0.150830  | -0.044421 | 11.00000 | 0.03117 |
| H3        | 2 | 0.155778 | 0.207954  | 0.171727  | 11.00000 | 0.02012 |
| H4        | 2 | 0.267905 | 0.835318  | 0.070567  | 11.00000 | 0.03665 |
| H5        | 2 | 0.050963 | 0.585577  | 0.228373  | 11.00000 | 0.00833 |
| H6        | 2 | 0.437882 | 0.235491  | 0.288774  | 11.00000 | 0.02610 |
| H7        | 2 | 0.469762 | 0.192553  | 0.107176  | 11.00000 | 0.01388 |
| H8        | 2 | 0.376974 | 0.071987  | 0.374859  | 11.00000 | 0.03058 |
| H9        | 2 | 0.195597 | 0.144695  | 0.003520  | 11.00000 | 0.03779 |
| H10       | 2 | 0.357298 | 0.373453  | 0.149566  | 11.00000 | 0.01196 |
| H11       | 2 | 0.394337 | 0.697031  | -0.026867 | 11.00000 | 0.03629 |
| H12       | 2 | 0.096165 | 0.775160  | 0.204267  | 11.00000 | 0.02324 |
| H13       | 2 | 0.291331 | 0.254524  | -0.009696 | 11.00000 | 0.03030 |
| H14       | 2 | 0.425249 | 0.006254  | 0.086982  | 11.00000 | 0.02715 |
| H15       | 2 | 0.259712 | 0.250737  | 0.330416  | 11.00000 | 0.02705 |
| H16       | 2 | 0.531344 | 0.043217  | 0.239159  | 11.00000 | 0.04228 |
| H17       | 2 | 0.216351 | 0.058613  | 0.307901  | 11.00000 | 0.03909 |
| H18       | 2 | 0.417353 | -0.055574 | 0.248174  | 11.00000 | 0.02751 |
| HKLF 4    |   |          |           |           |          |         |

REM hk171 100k .3 .1 .1  
 REM R1 = 0.0260 for 2842 Fo > 4sig(Fo) and 0.0301 for all 3055 data  
 REM 253 parameters refined using 0 restraints

END

|                                                                       |   |         |         |         |          |      |      |
|-----------------------------------------------------------------------|---|---------|---------|---------|----------|------|------|
| WGHT                                                                  |   | 0.0384  | 0.0000  |         |          |      |      |
| REM Highest difference peak 0.160, deepest hole -0.238, 1-sigma level |   |         |         |         |          |      |      |
| 0.039                                                                 |   |         |         |         |          |      |      |
| Q1                                                                    | 1 | 0.3711  | 0.1085  | 0.1260  | 11.00000 | 0.05 | 0.16 |
| Q2                                                                    | 1 | 0.0936  | 0.6627  | 0.1559  | 11.00000 | 0.05 | 0.16 |
| Q3                                                                    | 1 | 0.3167  | 0.1958  | 0.1444  | 11.00000 | 0.05 | 0.15 |
| Q4                                                                    | 1 | 0.3567  | 0.5223  | 0.0129  | 11.00000 | 0.05 | 0.15 |
| Q5                                                                    | 1 | 0.2368  | 0.5415  | 0.0789  | 11.00000 | 0.05 | 0.14 |
| Q6                                                                    | 1 | 0.1687  | 0.4769  | 0.1261  | 11.00000 | 0.05 | 0.13 |
| Q7                                                                    | 1 | 0.4770  | -0.0023 | 0.0536  | 11.00000 | 0.05 | 0.13 |
| Q8                                                                    | 1 | -0.0793 | 0.4188  | 0.1553  | 11.00000 | 0.05 | 0.13 |
| Q9                                                                    | 1 | 0.5592  | 0.0600  | 0.2159  | 11.00000 | 0.05 | 0.13 |
| Q10                                                                   | 1 | 0.4952  | 0.4788  | -0.1976 | 11.00000 | 0.05 | 0.12 |

|     |   |        |        |         |          |      |      |
|-----|---|--------|--------|---------|----------|------|------|
| Q11 | 1 | 0.2485 | 0.3410 | -0.0016 | 11.00000 | 0.05 | 0.12 |
| Q12 | 1 | 0.2161 | 0.3580 | -0.0402 | 11.00000 | 0.05 | 0.12 |
| Q13 | 1 | 0.1025 | 0.2278 | 0.0572  | 11.00000 | 0.05 | 0.12 |
| Q14 | 1 | 0.4146 | 0.2413 | -0.1243 | 11.00000 | 0.05 | 0.12 |
| Q15 | 1 | 0.3293 | 0.6135 | 0.0503  | 11.00000 | 0.05 | 0.12 |
| Q16 | 1 | 0.0547 | 0.0127 | 0.3642  | 11.00000 | 0.05 | 0.11 |
| Q17 | 1 | 0.4906 | 0.8134 | -0.0350 | 11.00000 | 0.05 | 0.11 |
| Q18 | 1 | 0.3625 | 0.6778 | 0.0318  | 11.00000 | 0.05 | 0.11 |
| Q19 | 1 | 0.2718 | 0.2807 | 0.1701  | 11.00000 | 0.05 | 0.11 |
| Q20 | 1 | 0.1723 | 0.7313 | 0.1022  | 11.00000 | 0.05 | 0.11 |

### Computed structures

stationary points shown in Scheme5 (BP86/SVP+ZPE)

complex of **12** and **1**

E=-1968.7322607

|    |            |            |            |
|----|------------|------------|------------|
| C  | -3.6518751 | 1.6947683  | -0.1070387 |
| H  | -4.1812431 | 1.4619721  | -1.0554229 |
| C  | -3.5161331 | 0.3906910  | 0.6964266  |
| H  | -4.5446920 | 0.0227422  | 0.9154158  |
| N  | -2.7471064 | 0.5803396  | 1.9290032  |
| N  | -2.3847543 | 2.3576099  | -0.4069863 |
| C  | -1.4430724 | 1.8196659  | -1.2153158 |
| O  | -1.6310541 | 0.7115637  | -1.7716250 |
| C  | -0.2130982 | 2.6492724  | -1.5112757 |
| C  | 0.4873383  | 3.5153678  | -0.6248073 |
| C  | 0.2585932  | 2.5413622  | -2.8391940 |
| C  | 1.5954102  | 4.2480160  | -1.0816019 |
| C  | 1.3604065  | 3.2786656  | -3.2922960 |
| C  | 2.0279268  | 4.1414657  | -2.4120233 |
| S  | 0.1768214  | 3.6762641  | 1.1773097  |
| O  | 1.1474843  | 4.6582138  | 1.6925154  |
| O  | -1.3033291 | 4.0864304  | 1.3530927  |
| O  | 0.2839967  | 2.2587368  | 1.7232208  |
| C  | -2.4774811 | -0.4515556 | 2.6831309  |
| C  | -2.9252093 | -1.8232056 | 2.4249848  |
| C  | -1.6450405 | -0.2597878 | 3.9382284  |
| C  | -2.3951345 | -2.8820619 | 3.0959029  |
| H  | -3.6959842 | -2.0003834 | 1.6613201  |
| C  | -0.6203220 | -1.3963715 | 4.0989732  |
| C  | -1.2992826 | -2.7726062 | 4.1102230  |
| H  | -1.7307483 | -3.0111930 | 5.1131434  |
| H  | -0.5528941 | -3.5687321 | 3.9069469  |
| Li | -1.5895640 | 2.2044484  | 2.1409051  |
| H  | -2.1575369 | 3.2580192  | 0.0709727  |
| C  | 0.1651764  | -1.9446808 | -0.6352111 |
| C  | 0.3992808  | -1.9558196 | -2.0009535 |

|   |            |            |            |
|---|------------|------------|------------|
| C | 0.6330930  | -2.9861862 | 0.2479300  |
| C | 1.1637877  | -3.0603987 | -2.5726317 |
| C | 1.4607054  | -3.1639478 | -3.9515673 |
| C | 1.6221062  | -4.0724943 | -1.6909313 |
| C | 2.1978860  | -4.2465853 | -4.4386795 |
| H | 1.0954771  | -2.3724226 | -4.6209080 |
| C | 2.3661297  | -5.1637180 | -2.1813813 |
| C | 2.6499885  | -5.2450419 | -3.5489888 |
| H | 2.4256811  | -4.3208318 | -5.5123154 |
| H | 2.7072606  | -5.9289508 | -1.4698141 |
| H | 3.2318617  | -6.0982649 | -3.9299136 |
| O | 1.3656592  | -4.0383659 | -0.3545221 |
| O | 0.4676606  | -3.0662491 | 1.4555641  |
| O | -0.0246609 | -1.0288389 | -2.8537199 |
| H | -0.6026265 | -0.3253270 | -2.3974872 |
| H | -2.7805282 | -3.8927861 | 2.8759933  |
| H | -0.3900205 | -1.1229015 | -0.1651632 |
| H | -1.1297877 | 0.7234690  | 3.9201534  |
| H | -2.3382200 | -0.2399562 | 4.8114343  |
| H | 0.0835177  | -1.3756288 | 3.2417875  |
| H | -0.0248289 | -1.2440905 | 5.0211684  |
| H | -3.0303397 | -0.3671938 | 0.0459451  |
| H | -4.2684508 | 2.4281464  | 0.4504182  |
| H | -0.2717186 | 1.8642729  | -3.5239336 |
| H | 1.6948781  | 3.1750460  | -4.3352500 |
| H | 2.8956642  | 4.7266030  | -2.7521832 |
| H | 2.1179361  | 4.8926966  | -0.3604832 |

### TS 13

E=-1968.6623721  $v_i=161$

|   |            |            |            |
|---|------------|------------|------------|
| C | -1.5944016 | 1.3884092  | -1.5026212 |
| H | -1.9315307 | 1.6187864  | -2.5335731 |
| C | -0.6427131 | 0.1821600  | -1.5596471 |
| H | -1.1662824 | -0.7052759 | -1.9781776 |
| N | -0.0225705 | -0.0940837 | -0.2349406 |
| N | -0.9772923 | 2.5934779  | -0.9613258 |
| C | -0.6545270 | 3.6580493  | -1.7837995 |
| O | -0.7326367 | 3.5795199  | -3.0098934 |
| C | -0.3022337 | 4.9732253  | -1.1036157 |
| C | 0.3477244  | 5.1984101  | 0.1425428  |
| C | -0.6986467 | 6.1081494  | -1.8462914 |
| C | 0.5438735  | 6.5067348  | 0.6181798  |
| C | -0.5100594 | 7.4112131  | -1.3681745 |
| H | -1.1650459 | 5.9269581  | -2.8256665 |
| C | 0.1054373  | 7.6128690  | -0.1243221 |
| H | 1.0670582  | 6.6331464  | 1.5766567  |
| H | -0.8413590 | 8.2688169  | -1.9730286 |
| H | 0.2629661  | 8.6297139  | 0.2660306  |
| S | 1.1329823  | 3.9087634  | 1.1800838  |
| O | 1.7645637  | 4.5875160  | 2.3255178  |
| O | 0.0269986  | 2.8967936  | 1.5634957  |



|    |            |            |            |
|----|------------|------------|------------|
| O  | 2.0695458  | 3.1632459  | 0.2328754  |
| C  | -0.8335915 | -0.6453144 | 0.7733784  |
| C  | -1.8266192 | -1.5932763 | 0.4903781  |
| C  | -0.3684181 | -0.4328753 | 2.1829254  |
| C  | -2.0720341 | -2.5838967 | 1.4518195  |
| H  | -2.1341166 | -1.7694040 | -0.5491558 |
| C  | -1.3400878 | -0.9876257 | 3.2365662  |
| H  | 0.6509510  | -0.8831045 | 2.2768137  |
| H  | -0.2089342 | 0.6611973  | 2.3306210  |
| C  | -1.8182754 | -2.4096151 | 2.9026679  |
| H  | -0.8722140 | -0.9532380 | 4.2391118  |
| H  | -2.2218831 | -0.3135022 | 3.2763160  |
| H  | -2.7591780 | -2.6549872 | 3.4475293  |
| H  | -1.1206328 | -3.2267607 | 3.2310870  |
| Li | 0.9653632  | 1.6435019  | 0.2124996  |
| H  | -1.0031469 | 2.7690426  | 0.0621488  |
| C  | 0.4225138  | -3.7128105 | 0.9990672  |
| C  | 0.6352833  | -3.5651215 | -0.4015576 |
| C  | 0.1536877  | -4.9622824 | 1.6580805  |
| C  | 0.6016783  | -4.8258645 | -1.1727785 |
| C  | 0.8370120  | -4.8511372 | -2.5661615 |
| C  | 0.3187137  | -6.0431667 | -0.5005772 |
| C  | 0.7953690  | -6.0536945 | -3.2752121 |
| H  | 1.0559813  | -3.8922747 | -3.0583580 |
| C  | 0.2738003  | -7.2574522 | -1.2135625 |
| C  | 0.5112585  | -7.2568591 | -2.5926340 |
| H  | 0.9831119  | -6.0656168 | -4.3590294 |
| H  | 0.0521614  | -8.1831518 | -0.6635148 |
| H  | 0.4759701  | -8.2076639 | -3.1462806 |
| O  | 0.0684129  | -6.1058994 | 0.8428743  |
| O  | -0.0669925 | -5.1133206 | 2.8561408  |
| O  | 0.8261501  | -2.4543470 | -0.9984347 |
| H  | 0.6372601  | -0.9684786 | -0.4241313 |
| H  | -2.5726006 | -3.5104398 | 1.1254262  |
| H  | 0.6523440  | -2.8754091 | 1.6673025  |
| H  | -2.4879721 | 1.1374467  | -0.8912019 |
| H  | 0.1921130  | 0.4027460  | -2.2543089 |

## 15

E=-1968.7106610

|   |            |            |            |
|---|------------|------------|------------|
| C | 0.1239127  | 1.0259535  | -1.6813914 |
| H | 0.3687278  | 1.0531907  | -2.7646478 |
| C | 1.4137838  | 0.6493148  | -0.9291411 |
| H | 1.7928486  | -0.3284198 | -1.3013953 |
| N | 1.2612073  | 0.6189857  | 0.5456254  |
| N | -0.4193625 | 2.3162040  | -1.2689120 |
| C | 0.1345301  | 3.4888407  | -1.7449435 |
| O | 1.1589413  | 3.4814890  | -2.4311256 |
| C | -0.6203895 | 4.7774276  | -1.4694728 |
| C | -1.3833540 | 5.1316724  | -0.3223362 |
| C | -0.5129825 | 5.7291942  | -2.5079458 |

|    |            |            |            |
|----|------------|------------|------------|
| C  | -2.0306759 | 6.3776323  | -0.2574576 |
| C  | -1.1676753 | 6.9660213  | -2.4466664 |
| C  | -1.9375276 | 7.2894918  | -1.3194383 |
| S  | -1.4997977 | 4.1396673  | 1.2140051  |
| O  | -2.3040810 | 4.9175184  | 2.1739875  |
| O  | -2.0957182 | 2.7718650  | 0.8238555  |
| O  | -0.0492979 | 3.8674115  | 1.6097859  |
| C  | 0.8939889  | -0.5967648 | 1.2001138  |
| C  | 0.3020074  | -1.6376849 | 0.5611702  |
| C  | 1.1539155  | -0.5884494 | 2.6928706  |
| C  | -0.1452392 | -2.9035744 | 1.2525109  |
| H  | 0.1491943  | -1.5871510 | -0.5253078 |
| C  | 1.0448585  | -1.9880849 | 3.3115318  |
| C  | -0.1920571 | -2.7243457 | 2.7853206  |
| H  | -1.1027331 | -2.1337015 | 3.0264914  |
| H  | -0.3037193 | -3.6998340 | 3.2962499  |
| Li | -0.1861154 | 2.0636466  | 1.0551503  |
| H  | -1.3542967 | 2.3707511  | -0.8203184 |
| C  | 0.7829343  | -4.1337876 | 0.8065799  |
| C  | 0.8222009  | -4.2122348 | -0.7206482 |
| C  | 0.3004836  | -5.4041472 | 1.4770562  |
| C  | -0.2360217 | -5.0549525 | -1.3243371 |
| C  | -0.5158460 | -5.0018419 | -2.7086262 |
| C  | -0.9842359 | -5.9337233 | -0.5062395 |
| C  | -1.5354904 | -5.7824612 | -3.2586822 |
| H  | 0.0944190  | -4.3225462 | -3.3229122 |
| C  | -2.0066582 | -6.7286875 | -1.0524800 |
| C  | -2.2812890 | -6.6416653 | -2.4235549 |
| H  | -1.7566501 | -5.7303368 | -4.3347683 |
| H  | -2.5615876 | -7.4097241 | -0.3917998 |
| H  | -3.0852146 | -7.2602839 | -2.8507642 |
| O  | -0.7196119 | -6.1025537 | 0.8355812  |
| O  | 0.6774782  | -5.8111565 | 2.5497559  |
| O  | 1.6296194  | -3.5626572 | -1.3792032 |
| H  | -1.1690667 | -3.1566543 | 0.8971837  |
| H  | 1.8062209  | -3.9280614 | 1.1740883  |
| H  | 2.1593254  | -0.1527080 | 2.8929518  |
| H  | 0.4311675  | 0.1035090  | 3.1867916  |
| H  | 1.9591933  | -2.5738799 | 3.0757066  |
| H  | 1.0072615  | -1.9104617 | 4.4164896  |
| H  | 2.1692396  | 1.4218297  | -1.1691296 |
| H  | -0.6669252 | 0.2656323  | -1.5270841 |
| H  | 0.1117622  | 5.4608171  | -3.3721805 |
| H  | -1.0696332 | 7.6787573  | -3.2793691 |
| H  | -2.4552630 | 8.2584920  | -1.2539241 |
| H  | -2.5929441 | 6.6184045  | 0.6559728  |
| H  | 2.1006994  | 1.0062681  | 0.9957770  |

**TS 14**E=-1968.6794462  $v_i=729$ 

|    |            |            |            |
|----|------------|------------|------------|
| C  | -2.9015215 | 1.6763161  | -0.9777069 |
| H  | -3.1849280 | 1.5761805  | -2.0469826 |
| C  | -2.2621869 | 0.3516098  | -0.5256486 |
| H  | -3.0172895 | -0.4592173 | -0.6568757 |
| N  | -1.7819026 | 0.4315297  | 0.8519827  |
| N  | -2.0256882 | 2.8292712  | -0.8099190 |
| C  | -0.9912325 | 3.0636995  | -1.6838067 |
| O  | -0.7270596 | 2.2822796  | -2.6028929 |
| C  | -0.2442287 | 4.3811508  | -1.5337550 |
| C  | 0.0426301  | 5.1158885  | -0.3490466 |
| C  | 0.2159871  | 4.9090176  | -2.7607200 |
| C  | 0.7295038  | 6.3405581  | -0.4235546 |
| C  | 0.8925950  | 6.1330760  | -2.8338162 |
| C  | 1.1437613  | 6.8581477  | -1.6595112 |
| S  | -0.2826040 | 4.5474685  | 1.3672576  |
| O  | 0.2253052  | 5.5963852  | 2.2722365  |
| O  | -1.7970650 | 4.2802399  | 1.4768482  |
| O  | 0.3975174  | 3.1858918  | 1.4670920  |
| C  | -1.3282589 | -0.6367914 | 1.4553457  |
| C  | -1.2805255 | -1.9707073 | 0.8514511  |
| C  | -0.8515286 | -0.4770984 | 2.8934473  |
| C  | -0.8777364 | -3.1468819 | 1.5966057  |
| H  | -1.9650736 | -2.1428642 | 0.0042062  |
| C  | 0.0528924  | -1.6170931 | 3.3785251  |
| C  | -0.5653760 | -2.9849813 | 3.0757785  |
| H  | -1.5345497 | -3.0874413 | 3.6166105  |
| H  | 0.0757900  | -3.8151619 | 3.4340704  |
| Li | -1.2894187 | 2.2836751  | 1.4424820  |
| H  | -2.2629580 | 3.5692606  | -0.1200275 |
| C  | 0.8791362  | -3.7801369 | 0.8800632  |
| C  | 0.7890529  | -3.4949042 | -0.5207966 |
| C  | 1.1038393  | -5.1717032 | 1.3281755  |
| C  | 0.7157728  | -4.5813780 | -1.4745005 |
| C  | 0.5490787  | -4.3778730 | -2.8679708 |
| C  | 0.8273128  | -5.9071954 | -0.9758950 |
| C  | 0.5004358  | -5.4687041 | -3.7360268 |
| H  | 0.4634584  | -3.3447141 | -3.2348457 |
| C  | 0.7823593  | -7.0059101 | -1.8514282 |
| C  | 0.6187277  | -6.7805387 | -3.2235856 |
| H  | 0.3716467  | -5.3093792 | -4.8164839 |
| H  | 0.8728686  | -8.0188896 | -1.4350589 |
| H  | 0.5819064  | -7.6409434 | -3.9087036 |
| O  | 0.9730046  | -6.1754452 | 0.3582017  |
| O  | 1.3450527  | -5.5193692 | 2.4640330  |
| O  | 0.6050076  | -2.2595481 | -0.8840672 |
| H  | -0.1100793 | -1.8483880 | -0.1161493 |
| H  | -1.4322958 | -4.0679145 | 1.3469168  |
| H  | 1.4343390  | -3.0463694 | 1.4834227  |
| H  | -0.3436654 | 0.5031304  | 3.0117493  |

|   |            |            |            |
|---|------------|------------|------------|
| H | -1.7630862 | -0.4354884 | 3.5318826  |
| H | 1.0504394  | -1.5364751 | 2.8901564  |
| H | 0.2441444  | -1.5148075 | 4.4654527  |
| H | -1.4193231 | 0.1202857  | -1.2157716 |
| H | -3.8232351 | 1.8706959  | -0.3918903 |
| H | 0.0216551  | 4.3134451  | -3.6647045 |
| H | 1.2265757  | 6.5170804  | -3.8097334 |
| H | 1.6751269  | 7.8213488  | -1.6977403 |
| H | 0.9430469  | 6.8667217  | 0.5177487  |

## 16

E=-1968.7221240

|    |            |            |            |
|----|------------|------------|------------|
| C  | -2.5488399 | 1.7441584  | -1.2283762 |
| H  | -2.7134250 | 1.7315368  | -2.3262258 |
| C  | -2.0357639 | 0.3514368  | -0.8188392 |
| H  | -2.7781395 | -0.4103676 | -1.1400404 |
| N  | -1.7532087 | 0.2951166  | 0.6181102  |
| N  | -1.6316916 | 2.8260572  | -0.8923624 |
| C  | -0.5581862 | 3.1108764  | -1.7073802 |
| O  | -0.2869390 | 2.4128025  | -2.6872495 |
| C  | 0.2199548  | 4.3834909  | -1.4103238 |
| C  | 0.4882840  | 4.9917538  | -0.1526349 |
| C  | 0.7353014  | 5.0114214  | -2.5661719 |
| C  | 1.2121833  | 6.1951508  | -0.0856367 |
| C  | 1.4476659  | 6.2154751  | -2.4988879 |
| C  | 1.6804807  | 6.8162041  | -1.2526680 |
| S  | 0.0891049  | 4.2663311  | 1.4843268  |
| O  | 0.6134099  | 5.1935305  | 2.5049323  |
| O  | -1.4383641 | 4.0573391  | 1.5272719  |
| O  | 0.7064224  | 2.8714413  | 1.4576591  |
| C  | -1.7725473 | -0.8077926 | 1.2923729  |
| C  | -2.0469225 | -2.1964226 | 0.7382785  |
| C  | -1.4963471 | -0.7752161 | 2.7820328  |
| C  | -0.9254987 | -3.2024648 | 1.1239127  |
| H  | -2.9899979 | -2.5667535 | 1.1982320  |
| C  | -0.4125877 | -1.7908712 | 3.2011462  |
| C  | -0.7203267 | -3.1910439 | 2.6552601  |
| H  | -1.6611589 | -3.5709027 | 3.1119224  |
| H  | 0.0736819  | -3.9032724 | 2.9556704  |
| Li | -1.0060903 | 2.0511750  | 1.3118325  |
| H  | -1.8770777 | 3.5109168  | -0.1502971 |
| C  | 0.3931774  | -2.8989706 | 0.2975443  |
| C  | 0.1195757  | -3.2034134 | -1.1803895 |
| C  | 1.5750665  | -3.6557002 | 0.8802147  |
| C  | 0.4736947  | -4.5729589 | -1.6138313 |
| C  | 0.0360393  | -5.0810234 | -2.8585877 |
| C  | 1.2595776  | -5.3961062 | -0.7742556 |
| C  | 0.3515137  | -6.3861001 | -3.2438082 |
| H  | -0.5600415 | -4.4122822 | -3.4975563 |
| C  | 1.5871523  | -6.7080054 | -1.1568014 |
| C  | 1.1249285  | -7.1970676 | -2.3859182 |

|   |            |            |            |
|---|------------|------------|------------|
| H | 0.0018345  | -6.7798438 | -4.2091897 |
| H | 2.2093381  | -7.3176666 | -0.4865012 |
| H | 1.3788704  | -8.2255952 | -2.6841153 |
| O | 1.7861440  | -4.9507972 | 0.4192387  |
| O | 2.2980445  | -3.2390378 | 1.7516391  |
| O | -0.4262010 | -2.3839800 | -1.9147547 |
| H | -2.1938373 | -2.1738285 | -0.3556290 |
| H | -1.2653832 | -4.2181329 | 0.8266903  |
| H | 0.6308583  | -1.8206537 | 0.3930373  |
| H | -1.2278281 | 0.2515404  | 3.1038038  |
| H | -2.4489691 | -1.0314547 | 3.3018542  |
| H | 0.5822718  | -1.4587206 | 2.8397468  |
| H | -0.3423944 | -1.8211940 | 4.3075351  |
| H | -1.1017408 | 0.1387546  | -1.3821761 |
| H | -3.5178418 | 1.9558921  | -0.7316843 |
| H | 0.5556069  | 4.5117288  | -3.5292145 |
| H | 1.8249827  | 6.6809388  | -3.4221654 |
| H | 2.2404733  | 7.7611468  | -1.1816227 |
| H | 1.4111411  | 6.6198452  | 0.9086909  |

Enantio-determining transition states shown in Figure3 (TPSS/SVP+ZPE)

**14a, pro (R)**

E(SCF+ZPE)=-12952.0004768 vi1060.58

|   |            |            |            |
|---|------------|------------|------------|
| C | -0.2181359 | -2.8000149 | 0.0290295  |
| H | 0.2816299  | -3.4321850 | 0.7804820  |
| C | -1.7623508 | -2.8146626 | 0.3738354  |
| H | -2.1634050 | -3.6721243 | -0.1959572 |
| C | 0.0443312  | -3.3620043 | -1.3600645 |
| C | -0.4403323 | -2.7192507 | -2.5234812 |
| C | 0.7695331  | -4.5533174 | -1.5234748 |
| C | -0.2069672 | -3.2488957 | -3.7927203 |
| H | -1.0142952 | -1.7890783 | -2.4365746 |
| C | 1.0075038  | -5.1043493 | -2.7925880 |
| H | 1.1631763  | -5.0695873 | -0.6406039 |
| C | 0.5177026  | -4.4510331 | -3.9393312 |
| H | -0.5769543 | -2.7509791 | -4.6941140 |
| H | 1.5772646  | -6.0337752 | -2.8723765 |
| C | -2.0571102 | -3.0987826 | 1.8459312  |
| C | -1.7754994 | -2.1784635 | 2.8713651  |
| C | -2.6162350 | -4.3432906 | 2.2087685  |
| C | -2.0430745 | -2.4824018 | 4.2128805  |
| H | -1.3167090 | -1.2092168 | 2.6537767  |
| C | -2.8864299 | -4.6619271 | 3.5408613  |
| H | -2.8358351 | -5.0847078 | 1.4302840  |

|    |            |            |            |
|----|------------|------------|------------|
| C  | -2.6004537 | -3.7290146 | 4.5577058  |
| H  | -1.7960537 | -1.7415839 | 4.9772060  |
| H  | -3.3162161 | -5.6283862 | 3.8209216  |
| N  | -2.3754100 | -1.5524874 | -0.0706572 |
| N  | 0.4037979  | -1.4517571 | 0.1427258  |
| O  | 0.6883505  | -4.8918365 | -5.2179927 |
| O  | -2.8916217 | -4.1221520 | 5.8315711  |
| C  | -2.5936233 | -3.2300901 | 6.8999940  |
| H  | -2.8954531 | -3.7506839 | 7.8206091  |
| H  | -1.5120955 | -2.9999203 | 6.9454469  |
| H  | -3.1620796 | -2.2847002 | 6.8102751  |
| C  | 1.4088940  | -6.1003495 | -5.4322654 |
| H  | 1.4155086  | -6.2586668 | -6.5204853 |
| H  | 2.4503950  | -6.0213873 | -5.0668181 |
| H  | 0.9147334  | -6.9592716 | -4.9390206 |
| C  | 1.2856449  | -1.1673097 | 1.1947166  |
| O  | 1.3237130  | -1.8014646 | 2.2309746  |
| C  | 2.2849135  | -0.0514086 | 0.8599360  |
| C  | 1.9583468  | 1.3231102  | 0.7978549  |
| C  | 3.6021903  | -0.4634223 | 0.5666634  |
| C  | 2.9325755  | 2.2587455  | 0.3873866  |
| C  | 4.6040466  | 0.4745476  | 0.2438250  |
| C  | 4.2640743  | 1.8416556  | 0.1476408  |
| S  | 0.2142373  | 1.8401228  | 1.1699494  |
| O  | 0.2328236  | 3.1686626  | 1.7932272  |
| O  | -0.4758660 | 1.7077309  | -0.1815305 |
| O  | -0.3184052 | 0.7217726  | 2.0475681  |
| C  | -3.5833655 | -1.5241045 | -0.5667858 |
| C  | -4.0983434 | -0.2277699 | -1.0263474 |
| C  | -4.4620054 | -2.7555438 | -0.7267468 |
| C  | -5.2952771 | -0.1129879 | -1.8353256 |
| H  | -3.3201141 | 0.5289204  | -1.2036173 |
| C  | -5.9222856 | -2.4347087 | -1.0814343 |
| H  | -4.0100125 | -3.3758275 | -1.5277132 |
| H  | -4.4132985 | -3.3596736 | 0.1952870  |
| C  | -6.0257108 | -1.3961023 | -2.2028417 |
| H  | -6.4467996 | -3.3612023 | -1.3709500 |
| H  | -6.4430858 | -2.0577956 | -0.1791860 |
| H  | -7.0766838 | -1.1845540 | -2.4629872 |
| H  | -5.5438870 | -1.7860026 | -3.1226010 |
| Li | -1.2461137 | 0.0116008  | 0.4346456  |
| H  | 0.6968337  | -1.0539777 | -0.7548699 |
| H  | -5.2415905 | 0.6289870  | -2.6423656 |
| C  | -7.7309426 | 1.3505942  | -1.7037374 |
| C  | -6.6892835 | 0.8629143  | -0.7763253 |
| C  | -6.8984722 | 3.6134585  | -1.3551250 |
| C  | -7.0149093 | 4.9622908  | -1.7205053 |
| C  | -5.9593177 | 3.2077909  | -0.3741654 |
| C  | -6.1797877 | 5.9049617  | -1.1129023 |
| H  | -7.7502267 | 5.2443367  | -2.4788620 |
| C  | -5.1206991 | 4.1795736  | 0.2237503  |

|    |            |            |            |
|----|------------|------------|------------|
| C  | -5.2294505 | 5.5180058  | -0.1445735 |
| H  | -6.2650124 | 6.9580693  | -1.4003174 |
| H  | -4.3904922 | 3.8477378  | 0.9678870  |
| H  | -4.5769280 | 6.2674576  | 0.3129595  |
| H  | -4.5539873 | 0.4465311  | 0.2065577  |
| Br | 4.0227556  | -2.3216530 | 0.5573829  |
| Br | 6.3774819  | -0.0959430 | -0.0839199 |
| Br | 5.5954263  | 3.1032069  | -0.3219931 |
| Br | 2.4898794  | 4.0741725  | 0.0687308  |
| H  | -6.9907315 | -0.0414909 | -0.2383662 |
| O  | -7.7189460 | 2.7185418  | -1.9960468 |
| O  | -5.0162844 | 1.3331901  | 0.7868390  |
| C  | -5.9034022 | 1.8026563  | -0.0362246 |
| O  | -8.5598692 | 0.6645418  | -2.2599611 |

#### 14b pro (S)

E(SCF+ZPE)=-12951.9963444 vi1250.16

|   |            |            |            |
|---|------------|------------|------------|
| C | 1.4221130  | -0.8223904 | -0.7352191 |
| H | 2.4991760  | -0.6008724 | -0.7972944 |
| C | 1.2607276  | -2.1461723 | 0.1151788  |
| H | 1.2149619  | -2.9709401 | -0.6170719 |
| C | 0.8678495  | -0.9947320 | -2.1426009 |
| C | -0.5154221 | -1.1617139 | -2.3826706 |
| C | 1.7299911  | -1.0083322 | -3.2507926 |
| C | -1.0119214 | -1.3363005 | -3.6744487 |
| H | -1.2245168 | -1.1529756 | -1.5457182 |
| C | 1.2496890  | -1.1874501 | -4.5576346 |
| H | 2.8062915  | -0.8724066 | -3.0967841 |
| C | -0.1307683 | -1.3542910 | -4.7769037 |
| H | -2.0829823 | -1.4585128 | -3.8619918 |
| H | 1.9574320  | -1.1877641 | -5.3906465 |
| C | 2.4343397  | -2.4444600 | 1.0481391  |
| C | 3.0637729  | -1.4510286 | 1.8196979  |
| C | 2.8846860  | -3.7761162 | 1.1845769  |
| C | 4.1097510  | -1.7673241 | 2.6996506  |
| H | 2.7732439  | -0.3984438 | 1.7400404  |
| C | 3.9255464  | -4.1042647 | 2.0527462  |
| H | 2.4138409  | -4.5748527 | 0.6005185  |
| C | 4.5480196  | -3.0992265 | 2.8225594  |
| H | 4.5715203  | -0.9607434 | 3.2744895  |
| H | 4.2783502  | -5.1349868 | 2.1533794  |
| N | 0.0324818  | -2.0592527 | 0.9292508  |
| N | 0.8183739  | 0.3639932  | -0.0800163 |
| O | -0.7080257 | -1.5348492 | -5.9980875 |
| O | 5.5566288  | -3.5108480 | 3.6425198  |
| C | 6.2153693  | -2.5373835 | 4.4464515  |
| H | 6.9775637  | -3.0854102 | 5.0191661  |
| H | 6.7065440  | -1.7648215 | 3.8251370  |
| H | 5.5115571  | -2.0465637 | 5.1452835  |
| C | 0.1258005  | -1.5442039 | -7.1516558 |
| H | -0.5465931 | -1.6939776 | -8.0087281 |

|    |            |             |            |
|----|------------|-------------|------------|
| H  | 0.6635324  | -0.5844094  | -7.2699609 |
| H  | 0.8613093  | -2.3707811  | -7.1130999 |
| C  | 1.5936102  | 1.4893826   | 0.2146467  |
| O  | 2.8088867  | 1.4681296   | 0.2916380  |
| C  | 0.7683520  | 2.7765650   | 0.3240288  |
| C  | -0.0708695 | 3.0922437   | 1.4167397  |
| C  | 0.8396162  | 3.6607996   | -0.7732370 |
| C  | -0.8771228 | 4.2503698   | 1.3715189  |
| C  | 0.1063262  | 4.8649922   | -0.7855447 |
| C  | -0.7627767 | 5.1554342   | 0.2889855  |
| S  | -0.1464682 | 1.9194228   | 2.8543943  |
| O  | -0.3348665 | 2.6972657   | 4.0842210  |
| O  | -1.2562325 | 0.9563097   | 2.4510865  |
| O  | 1.1573541  | 1.1466269   | 2.7699131  |
| C  | -0.9326745 | -2.9262675  | 0.8643911  |
| C  | -1.0063341 | -4.0983700  | -0.0418617 |
| C  | -2.1189462 | -2.7475839  | 1.7944039  |
| C  | -2.2610022 | -4.7948728  | -0.2007017 |
| H  | -0.3871596 | -4.0608898  | -0.9495984 |
| C  | -3.4327098 | -2.8642025  | 1.0003558  |
| H  | -2.0832304 | -3.5287659  | 2.5815197  |
| H  | -2.0495765 | -1.7707004  | 2.3005779  |
| C  | -3.5780863 | -4.2432670  | 0.3292370  |
| H  | -4.2943810 | -2.6778339  | 1.6624738  |
| H  | -3.4480673 | -2.0684458  | 0.2319451  |
| H  | -4.2679306 | -4.1789492  | -0.5326443 |
| H  | -4.0604296 | -4.9652435  | 1.0147832  |
| Li | 0.1419903  | -0.3714246  | 2.0109613  |
| H  | -0.1420559 | 0.5776758   | -0.3614498 |
| C  | -2.0365560 | -6.5763955  | 1.0389627  |
| C  | -0.7489062 | -6.9649758  | 0.5804212  |
| C  | -3.2102145 | -7.4218182  | 0.8182546  |
| C  | -0.6394093 | -8.1350171  | -0.2796941 |
| C  | 0.5864932  | -8.5671107  | -0.8359447 |
| C  | -1.8177290 | -8.8725194  | -0.5512045 |
| C  | 0.6327100  | -9.7055721  | -1.6376227 |
| H  | 1.4858293  | -7.9849290  | -0.6145122 |
| C  | -1.7734318 | -10.0219232 | -1.3563075 |
| C  | -0.5498961 | -10.4304713 | -1.8936013 |
| H  | 1.5825222  | -10.0388135 | -2.0667957 |
| H  | -2.6999161 | -10.5704032 | -1.5462287 |
| H  | -0.5139534 | -11.3267778 | -2.5217077 |
| O  | -3.0431217 | -8.5029129  | -0.0605558 |
| O  | -4.3150453 | -7.2431076  | 1.2865980  |
| O  | 0.2544230  | -6.1800499  | 0.7977934  |
| H  | -0.2256070 | -5.0581977  | 0.5544551  |
| H  | -2.3470277 | -5.3858417  | -1.1198391 |
| H  | -2.0967435 | -5.9459804  | 1.9287982  |
| Br | -2.1834121 | 4.5950642   | 2.7003979  |
| Br | 1.9044160  | 3.1958518   | -2.2821241 |
| Br | 0.2638533  | 6.0640301   | -2.2399481 |



Br -1.7825399 6.7498746 0.2604944

**14c**, pro(S)

E(SCF+ZPE)=-12951.9947666 vi1175.18

|   |            |            |            |
|---|------------|------------|------------|
| C | -0.6877103 | -2.8147263 | -0.3244040 |
| H | -0.0130785 | -3.6919023 | -0.2868339 |
| C | -1.4983319 | -2.8071212 | 1.0360446  |
| H | -2.1350346 | -3.7099174 | 0.9961590  |
| C | -1.6419597 | -2.9989751 | -1.4941579 |
| C | -2.2308561 | -1.9369301 | -2.2117753 |
| C | -2.0411465 | -4.3082474 | -1.8099387 |
| C | -3.1954324 | -2.1815479 | -3.1898847 |
| H | -1.9038284 | -0.9039023 | -2.0574754 |
| C | -3.0075442 | -4.5723669 | -2.7925632 |
| H | -1.5836309 | -5.1566411 | -1.2854043 |
| C | -3.5984159 | -3.4995565 | -3.4865676 |
| H | -3.6408643 | -1.3566005 | -3.7531113 |
| H | -3.2779898 | -5.6085380 | -3.0120245 |
| C | -0.5786425 | -2.9269856 | 2.2521335  |
| C | -0.1673905 | -1.8142781 | 3.0078886  |
| C | -0.0882959 | -4.1985460 | 2.6264645  |
| C | 0.7077511  | -1.9528920 | 4.0984285  |
| H | -0.5392269 | -0.8150244 | 2.7571391  |
| C | 0.7771480  | -4.3528789 | 3.7073488  |
| H | -0.3978300 | -5.0868387 | 2.0626314  |
| C | 1.1864643  | -3.2270985 | 4.4553819  |
| H | 1.0005807  | -1.0614963 | 4.6591007  |
| H | 1.1505911  | -5.3381318 | 4.0019345  |
| N | -2.2761208 | -1.5711928 | 1.0663396  |
| N | 0.1213186  | -1.5779788 | -0.3370498 |
| O | -4.5477590 | -3.6344191 | -4.4592123 |
| O | 2.0301708  | -3.4781370 | 5.4946996  |
| C | 2.4807911  | -2.3840888 | 6.2873920  |
| H | 3.1450959  | -2.8177464 | 7.0488611  |
| H | 3.0452239  | -1.6510338 | 5.6808090  |
| H | 1.6362927  | -1.8710541 | 6.7855259  |
| C | -4.9593875 | -4.9437241 | -4.8270988 |
| H | -5.7074079 | -4.8144671 | -5.6231672 |
| H | -4.1124856 | -5.5426302 | -5.2144557 |
| H | -5.4214873 | -5.4805776 | -3.9753381 |
| C | 0.8601832  | -1.1111880 | -1.4317197 |
| O | 0.7225986  | -1.4799972 | -2.5791037 |
| C | 1.9554953  | -0.1098997 | -1.0172661 |
| C | 1.7288953  | 1.2461637  | -0.6822583 |
| C | 3.2700782  | -0.6185672 | -0.9824451 |
| C | 2.8112912  | 2.0589910  | -0.2796072 |
| C | 4.3664010  | 0.2063188  | -0.6608427 |
| C | 4.1333181  | 1.5532641  | -0.3082368 |
| S | -0.0171664 | 1.8770996  | -0.6345033 |
| O | -0.0394579 | 3.2932840  | -1.0278850 |
| O | -0.7808866 | 0.9502517  | -1.5585515 |

|    |            |            |            |
|----|------------|------------|------------|
| O  | -0.4447359 | 1.5420283  | 0.7892370  |
| C  | -3.5103294 | -1.5101194 | 1.4673789  |
| C  | -4.1269793 | -0.1653822 | 1.4687140  |
| C  | -4.3579061 | -2.6908277 | 1.9231106  |
| C  | -5.5057748 | 0.0595779  | 1.8062279  |
| H  | -3.4232922 | 0.6397334  | 1.7295808  |
| C  | -5.5873833 | -2.2566810 | 2.7410036  |
| H  | -4.6839064 | -3.2479889 | 1.0213833  |
| H  | -3.7272971 | -3.3829113 | 2.5072800  |
| C  | -6.3856236 | -1.1685535 | 1.9938896  |
| H  | -6.2362247 | -3.1293910 | 2.9304664  |
| H  | -5.2643912 | -1.8756009 | 3.7274979  |
| H  | -7.3126137 | -0.8967813 | 2.5230764  |
| H  | -6.6907255 | -1.5839701 | 1.0155080  |
| Li | -1.4131120 | -0.0185888 | 0.0827153  |
| H  | 0.5941829  | -1.4210655 | 0.5614246  |
| C  | -6.3875650 | 1.0429780  | 0.1619095  |
| C  | -5.2434012 | 1.6239061  | -0.4597917 |
| C  | -7.4759161 | 1.8964524  | 0.6715749  |
| C  | -5.0568525 | 3.0593335  | -0.4171296 |
| C  | -3.8828827 | 3.6957681  | -0.8882799 |
| C  | -6.0989496 | 3.8411648  | 0.1400450  |
| C  | -3.7669395 | 5.0819056  | -0.8162996 |
| H  | -3.0728466 | 3.0801393  | -1.2905237 |
| C  | -5.9884876 | 5.2378608  | 0.1986846  |
| C  | -4.8239167 | 5.8473541  | -0.2811429 |
| H  | -2.8513643 | 5.5674865  | -1.1662028 |
| H  | -6.8088430 | 5.8179801  | 0.6298200  |
| H  | -4.7328861 | 6.9374311  | -0.2284588 |
| O  | -7.2387107 | 3.2775012  | 0.6624262  |
| O  | -8.5276401 | 1.5064720  | 1.1271113  |
| O  | -4.2985601 | 0.8280463  | -0.8581598 |
| H  | -4.1611538 | 0.1212107  | 0.0968635  |
| H  | -5.7164776 | 0.9069792  | 2.4679968  |
| H  | -6.7257259 | 0.0787624  | -0.2234895 |
| Br | 3.5584182  | -2.4719331 | -1.3256863 |
| Br | 6.1246579  | -0.4904545 | -0.6776423 |
| Br | 5.5972463  | 2.6641179  | 0.1474126  |
| Br | 2.5406488  | 3.8167512  | 0.3790070  |

**14d**, pro( R)

E(SCF+ZPE)=-12952.0003504 vi1215.96

|   |            |            |            |
|---|------------|------------|------------|
| C | 0.9091555  | -0.9583193 | 0.5159365  |
| H | 1.2583565  | -0.6693148 | 1.5204012  |
| C | -0.1413171 | -2.1218841 | 0.7291033  |
| H | 0.4516679  | -3.0524697 | 0.6554316  |
| C | 2.1034993  | -1.4039743 | -0.3140897 |
| C | 3.4073935  | -1.3267074 | 0.2199200  |
| C | 1.9571956  | -1.8970997 | -1.6239946 |
| C | 4.5194566  | -1.7285515 | -0.5199793 |

|    |            |            |            |
|----|------------|------------|------------|
| H  | 3.5507005  | -0.9418762 | 1.2358220  |
| C  | 3.0647642  | -2.3002011 | -2.3848699 |
| H  | 0.9584125  | -1.9784176 | -2.0681343 |
| C  | 4.3580191  | -2.2194017 | -1.8320753 |
| H  | 5.5305085  | -1.6688865 | -0.1061921 |
| H  | 2.9077303  | -2.6777895 | -3.3985196 |
| C  | -0.7593736 | -2.1076857 | 2.1267391  |
| C  | -1.7545811 | -1.1916610 | 2.5100613  |
| C  | -0.2838032 | -3.0170644 | 3.0964195  |
| C  | -2.2628439 | -1.1791651 | 3.8162426  |
| H  | -2.1372437 | -0.4485208 | 1.8039079  |
| C  | -0.7777286 | -3.0141275 | 4.4022756  |
| H  | 0.4982349  | -3.7376921 | 2.8251824  |
| C  | -1.7734049 | -2.0884039 | 4.7740556  |
| H  | -3.0258955 | -0.4412292 | 4.0753312  |
| H  | -0.4060236 | -3.7154737 | 5.1552952  |
| N  | -1.1620387 | -2.0909208 | -0.3346448 |
| N  | 0.3234251  | 0.2747290  | -0.0844787 |
| O  | 5.5012389  | -2.5869425 | -2.4773860 |
| O  | -2.1931468 | -2.1488105 | 6.0710508  |
| C  | -3.1636684 | -1.2059873 | 6.5132764  |
| H  | -3.3339807 | -1.4252097 | 7.5775449  |
| H  | -2.7972809 | -0.1674972 | 6.4054218  |
| H  | -4.1159395 | -1.3133331 | 5.9595136  |
| C  | 5.4048656  | -3.0844250 | -3.8071520 |
| H  | 6.4348712  | -3.3085435 | -4.1207804 |
| H  | 4.7984376  | -4.0092676 | -3.8508277 |
| H  | 4.9689961  | -2.3313173 | -4.4912144 |
| C  | 0.0975997  | 1.4011814  | 0.7246352  |
| O  | 0.0197311  | 1.3525925  | 1.9359366  |
| C  | 0.0818984  | 2.7168980  | -0.0638123 |
| C  | -0.9943419 | 3.1482086  | -0.8724069 |
| C  | 1.2454914  | 3.5104468  | 0.0209348  |
| C  | -0.8727123 | 4.3329889  | -1.6304593 |
| C  | 1.3407174  | 4.7394379  | -0.6634274 |
| C  | 0.2777061  | 5.1476385  | -1.4991796 |
| S  | -2.5047101 | 2.0761500  | -0.9922065 |
| O  | -3.6868066 | 2.9345824  | -1.1262497 |
| O  | -2.1635298 | 1.1491904  | -2.1514351 |
| O  | -2.4578338 | 1.2335430  | 0.2700745  |
| C  | -1.7754317 | -3.1784246 | -0.6999946 |
| C  | -1.5424582 | -4.5122261 | -0.1007080 |
| C  | -2.8422928 | -3.0558011 | -1.7774530 |
| C  | -2.3352496 | -5.6506302 | -0.4942180 |
| C  | -3.0930350 | -4.3683570 | -2.5337680 |
| C  | -3.4042466 | -5.5071341 | -1.5557033 |
| Li | -1.6991694 | -0.2314805 | -0.8261345 |
| H  | 0.7134543  | 0.5062682  | -1.0036972 |
| C  | -0.9994937 | -6.9771948 | -1.5193863 |
| C  | 0.1775473  | -6.7817501 | -0.7456791 |
| C  | -1.6554264 | -8.2886838 | -1.5828106 |

|    |            |             |            |
|----|------------|-------------|------------|
| C  | 0.6405921  | -7.8579287  | 0.1159301  |
| C  | 1.7641985  | -7.7331785  | 0.9658519  |
| C  | -0.0693204 | -9.0831657  | 0.0854911  |
| C  | 2.1679512  | -8.8057301  | 1.7582953  |
| H  | 2.2983506  | -6.7783948  | 0.9755075  |
| C  | 0.3370535  | -10.1661150 | 0.8808256  |
| C  | 1.4517929  | -10.0203080 | 1.7113557  |
| H  | 3.0373262  | -8.7083642  | 2.4154874  |
| H  | -0.2319300 | -11.0985575 | 0.8355710  |
| H  | 1.7690439  | -10.8636299 | 2.3334726  |
| O  | -1.1792594 | -9.2673256  | -0.6983705 |
| O  | -2.5922280 | -8.5840038  | -2.2935884 |
| O  | 0.7043360  | -5.5992968  | -0.7028779 |
| H  | -0.2671088 | -4.8827316  | -0.5457711 |
| H  | -4.3460465 | -5.2821198  | -1.0119656 |
| H  | -3.5740412 | -6.4664684  | -2.0753717 |
| H  | -2.5487737 | -6.3846698  | 0.2914289  |
| H  | -1.1186871 | -6.3699911  | -2.4200052 |
| H  | -1.2511435 | -4.4906272  | 0.9591183  |
| H  | -3.7797034 | -2.7513735  | -1.2682783 |
| H  | -2.5805052 | -2.2351192  | -2.4674082 |
| H  | -2.2043924 | -4.6265743  | -3.1429443 |
| H  | -3.9272594 | -4.2401421  | -3.2434141 |
| Br | 2.7306812  | 2.8855133   | 1.0385867  |
| Br | 2.8858290  | 5.8154083   | -0.4841594 |
| Br | 0.4128936  | 6.7770963   | -2.4530869 |
| Br | -2.1926215 | 4.8334333   | -2.8948707 |

**14e**, pro( R)

E(SCF+ZPE)=-12951.9776499 vi1221.36

|   |            |            |            |
|---|------------|------------|------------|
| C | -0.2304951 | -1.8226838 | -0.1677179 |
| H | -0.0317479 | -0.7568385 | -0.3700137 |
| C | -1.3595567 | -2.1983400 | -1.2122325 |
| H | -0.7899100 | -2.1292231 | -2.1552778 |
| C | -0.5717809 | -1.9146000 | 1.3194980  |
| C | -0.0580912 | -2.9320244 | 2.1511143  |
| C | -1.3810780 | -0.9310061 | 1.9157479  |
| C | -0.3821677 | -2.9946044 | 3.5068750  |
| H | 0.6256808  | -3.6740570 | 1.7272249  |
| C | -1.7202517 | -0.9786731 | 3.2775165  |
| H | -1.7449725 | -0.0858686 | 1.3213152  |
| C | -1.2279705 | -2.0235462 | 4.0826482  |
| H | 0.0235159  | -3.7800746 | 4.1514985  |
| H | -2.3436013 | -0.1851851 | 3.6982497  |
| C | -1.9406701 | -3.6131407 | -1.2266639 |
| C | -2.0357677 | -4.4845998 | -0.1282445 |
| C | -2.4141187 | -4.0899023 | -2.4731689 |
| C | -2.5885618 | -5.7698606 | -0.2494474 |
| H | -1.6864548 | -4.1663354 | 0.8564376  |
| C | -2.9822081 | -5.3549926 | -2.6105558 |

|    |            |            |            |
|----|------------|------------|------------|
| H  | -2.3319695 | -3.4482952 | -3.3586307 |
| C  | -3.0759330 | -6.2123270 | -1.4932665 |
| H  | -2.6338918 | -6.4104557 | 0.6352110  |
| H  | -3.3463086 | -5.7142995 | -3.5776361 |
| N  | -2.2950290 | -1.0484966 | -1.3236975 |
| N  | 0.9846287  | -2.5349736 | -0.5608050 |
| O  | -1.4906927 | -2.1682578 | 5.4133940  |
| O  | -3.6400754 | -7.4310988 | -1.7189015 |
| C  | -3.7442372 | -8.3450503 | -0.6320847 |
| H  | -4.2187794 | -9.2482638 | -1.0419309 |
| H  | -2.7484381 | -8.6050990 | -0.2257459 |
| H  | -4.3741825 | -7.9360963 | 0.1813370  |
| C  | -2.3108598 | -1.1978642 | 6.0533345  |
| H  | -2.3850199 | -1.5103169 | 7.1051389  |
| H  | -1.8604465 | -0.1882147 | 6.0016513  |
| H  | -3.3243746 | -1.1661677 | 5.6085413  |
| C  | 2.1342775  | -1.9298691 | -1.0327784 |
| O  | 2.9485375  | -2.5036124 | -1.7369136 |
| C  | 2.4870491  | -0.5565008 | -0.4313452 |
| C  | 2.2716504  | 0.6881434  | -1.0612827 |
| C  | 3.2349586  | -0.5843410 | 0.7691917  |
| C  | 2.7992031  | 1.8755737  | -0.5064833 |
| C  | 3.7297380  | 0.5979098  | 1.3552999  |
| C  | 3.5154791  | 1.8360673  | 0.7090476  |
| S  | 1.2805878  | 0.8097992  | -2.6076933 |
| O  | 2.1783345  | 1.2757864  | -3.6705902 |
| O  | 0.6613084  | -0.5709443 | -2.7959686 |
| O  | 0.1091700  | 1.7185370  | -2.2393172 |
| C  | -3.5007664 | -0.9643140 | -0.8473444 |
| C  | -4.2214437 | 0.3096288  | -1.1277501 |
| C  | -4.2407459 | -2.0350370 | -0.0609958 |
| C  | -5.6320338 | 0.4513781  | -0.8802723 |
| H  | -3.8432812 | 0.8432446  | -2.0133954 |
| C  | -5.4993494 | -1.5271359 | 0.6616537  |
| H  | -4.5172265 | -2.8294079 | -0.7809408 |
| H  | -3.5544525 | -2.5041015 | 0.6592084  |
| C  | -6.3978658 | -0.6903312 | -0.2539397 |
| H  | -6.0610558 | -2.3879166 | 1.0616900  |
| H  | -5.2001772 | -0.9219263 | 1.5396230  |
| H  | -7.2940909 | -0.3174712 | 0.2720172  |
| H  | -6.7693858 | -1.3160317 | -1.0935407 |
| Li | -1.1105733 | 0.2545150  | -2.3195038 |
| H  | 0.8633292  | -3.4777602 | -0.9404417 |
| H  | -6.1942188 | 1.0879999  | -1.5729027 |
| C  | -7.1946275 | 2.3829313  | 0.6937762  |
| C  | -5.8124804 | 1.8949861  | 0.7295266  |
| C  | -6.3453860 | 4.4975695  | -0.1635800 |
| C  | -6.6749692 | 5.7851883  | -0.6137418 |
| C  | -4.9939045 | 4.0807217  | -0.0924868 |
| C  | -5.6497364 | 6.6534933  | -0.9997105 |
| H  | -7.7275835 | 6.0776921  | -0.6571245 |

|    |            |            |            |
|----|------------|------------|------------|
| C  | -3.9738874 | 4.9741529  | -0.4935722 |
| C  | -4.2987152 | 6.2520695  | -0.9441513 |
| H  | -5.9049771 | 7.6583087  | -1.3523428 |
| H  | -2.9364464 | 4.6307694  | -0.4370144 |
| H  | -3.5091828 | 6.9428284  | -1.2547852 |
| H  | -3.6872460 | 1.1914789  | -0.2323801 |
| H  | -5.6357397 | 1.0795006  | 1.4338175  |
| O  | -7.3865758 | 3.6726595  | 0.1824746  |
| O  | -3.5236477 | 2.2457643  | 0.4084613  |
| C  | -4.7180598 | 2.7425005  | 0.4086258  |
| O  | -8.1794460 | 1.7574490  | 1.0273896  |
| Br | 3.6197461  | -2.2570809 | 1.5930610  |
| Br | 4.6866275  | 0.5325151  | 2.9864550  |
| Br | 4.1937413  | 3.4289570  | 1.4754118  |
| Br | 2.5689131  | 3.5397951  | -1.3824196 |

**14f**, pro (S)

E(SCF+ZPE)=-12951.9742793 vi1191.21

|   |           |           |            |
|---|-----------|-----------|------------|
| C | 1.0789169 | 2.0087392 | -0.8155619 |
| H | 0.1754162 | 2.5318403 | -0.4760411 |
| C | 1.7299645 | 1.3130762 | 0.4138420  |
| H | 2.5744789 | 0.6877824 | 0.0804313  |
| C | 1.9914415 | 3.0498479 | -1.4561171 |
| C | 3.3747642 | 2.8372086 | -1.6405042 |
| C | 1.4309742 | 4.2417996 | -1.9494957 |
| C | 4.1703479 | 3.7859973 | -2.2845741 |
| H | 3.8502644 | 1.9209939 | -1.2729677 |
| C | 2.2178818 | 5.2041191 | -2.5973457 |
| H | 0.3534007 | 4.4047214 | -1.8387875 |
| C | 3.5978585 | 4.9807066 | -2.7679716 |
| H | 5.2439928 | 3.6282997 | -2.4244552 |
| H | 1.7434689 | 6.1169865 | -2.9669192 |
| C | 2.2510455 | 2.3171261 | 1.4461116  |
| C | 1.5318281 | 3.4809259 | 1.7811094  |
| C | 3.4332493 | 2.0405269 | 2.1657870  |
| C | 1.9679259 | 4.3459972 | 2.7985917  |
| H | 0.6245244 | 3.7613069 | 1.2286797  |
| C | 3.8833136 | 2.8948239 | 3.1718475  |
| H | 4.0111441 | 1.1391332 | 1.9323979  |
| C | 3.1531587 | 4.0565987 | 3.5010405  |
| H | 1.3845351 | 5.2445709 | 3.0152687  |
| H | 4.8043979 | 2.6856566 | 3.7242865  |
| N | 0.7217891 | 0.5069506 | 1.1459365  |
| N | 0.6433105 | 1.0587675 | -1.8832437 |
| O | 4.4544751 | 5.8483433 | -3.3810261 |
| O | 3.6713858 | 4.8268285 | 4.4978311  |
| C | 2.9894491 | 6.0238916 | 4.8584110  |
| H | 3.5845647 | 6.4790079 | 5.6632420  |
| H | 2.9264881 | 6.7255695 | 4.0052086  |
| H | 1.9690335 | 5.8119493 | 5.2308157  |

|    |            |            |            |
|----|------------|------------|------------|
| C  | 3.9299081  | 7.0637228  | -3.9027890 |
| H  | 4.7833291  | 7.5934669  | -4.3509905 |
| H  | 3.1652276  | 6.8749193  | -4.6801877 |
| H  | 3.4867654  | 7.6900698  | -3.1049175 |
| C  | -0.6668646 | 0.8175321  | -2.3143210 |
| O  | -0.9505565 | 0.7927388  | -3.5012969 |
| C  | -1.6742341 | 0.1951545  | -1.3313915 |
| C  | -2.5736128 | 0.8933271  | -0.4980228 |
| C  | -1.7784217 | -1.2170997 | -1.3981962 |
| C  | -3.5044030 | 0.1919773  | 0.3008663  |
| C  | -2.7541410 | -1.9189387 | -0.6625122 |
| C  | -3.6211131 | -1.2108302 | 0.2011216  |
| S  | -2.4693128 | 2.7420169  | -0.4056253 |
| O  | -3.8325995 | 3.2908201  | -0.4217495 |
| O  | -1.7506779 | 2.9217031  | 0.9435747  |
| O  | -1.5907164 | 3.1081833  | -1.5528747 |
| C  | 0.7968239  | -0.7859668 | 1.2273696  |
| C  | 1.7760433  | -1.6211814 | 0.4722236  |
| C  | -0.1951069 | -1.5058966 | 2.1237866  |
| C  | 1.7703890  | -3.0488235 | 0.6185299  |
| H  | 1.9593606  | -1.2657118 | -0.5524064 |
| C  | 0.3667618  | -2.8147495 | 2.7025052  |
| C  | 0.8426599  | -3.7430456 | 1.5793639  |
| H  | -0.0274102 | -4.0647340 | 0.9669511  |
| H  | 1.2967030  | -4.6715952 | 1.9697911  |
| Li | -0.5964305 | 1.8626900  | 1.8396551  |
| H  | 1.2037905  | 1.2034776  | -2.7298896 |
| C  | 3.7235215  | -3.5016015 | 1.6811855  |
| C  | 4.5241916  | -2.5571145 | 0.9969510  |
| C  | 3.9362629  | -4.9403933 | 1.5447866  |
| C  | 5.5163760  | -3.0466556 | 0.0472984  |
| C  | 6.3335295  | -2.1862730 | -0.7202962 |
| C  | 5.6677009  | -4.4474654 | -0.0933038 |
| C  | 7.2794669  | -2.7115400 | -1.5984198 |
| H  | 6.2001579  | -1.1070313 | -0.5992202 |
| C  | 6.6222333  | -4.9799441 | -0.9746218 |
| C  | 7.4211433  | -4.1094851 | -1.7204345 |
| H  | 7.9115505  | -2.0437948 | -2.1918368 |
| H  | 6.7144411  | -6.0659693 | -1.0603813 |
| H  | 8.1649770  | -4.5233669 | -2.4092285 |
| O  | 4.8924150  | -5.3409539 | 0.5987568  |
| O  | 3.3375771  | -5.8121594 | 2.1410077  |
| O  | 4.2522226  | -1.2952500 | 1.1093196  |
| H  | 2.9965353  | -1.2878264 | 0.9359126  |
| H  | 2.0858438  | -3.6345602 | -0.2521311 |
| H  | 3.2158518  | -3.1917414 | 2.5967351  |
| H  | 1.2049979  | -2.5926469 | 3.3913144  |
| H  | -0.4068517 | -3.3197643 | 3.3045605  |
| H  | -0.5271226 | -0.8233703 | 2.9252346  |
| H  | -1.0872154 | -1.7419123 | 1.5121897  |
| Br | -0.5824813 | -2.2015520 | -2.5114717 |

Br -2.8925962 -3.8057300 -0.7978347  
Br -4.9032199 -2.1499695 1.2323789  
Br -4.5754780 1.1053069 1.5763924

**14g, pro(S)**

E(SCF+ZPE)=-12951.9968688 vi1208.20

C 1.3458915 -0.5279370 0.1610886  
H 0.9139564 0.3995276 -0.2486123  
C 2.0940452 -0.1522662 1.4891527  
H 2.7352347 -1.0176321 1.7549287  
C 2.3255552 -1.1022014 -0.8533644  
C 2.9335649 -2.3618573 -0.6627163  
C 2.6772200 -0.3680875 -1.9955730  
C 3.8570269 -2.8652085 -1.5771634  
H 2.6717388 -2.9748432 0.2086439  
C 3.6013498 -0.8584669 -2.9302013  
H 2.2218138 0.6138721 -2.1666352  
C 4.1991282 -2.1153522 -2.7229314  
H 4.3252747 -3.8438921 -1.4359464  
H 3.8409037 -0.2559307 -3.8099102  
C 3.0029786 1.0543189 1.2663438  
C 2.4537643 2.3308486 1.0415176  
C 4.4064029 0.9211181 1.2692971  
C 3.2771798 3.4475563 0.8370845  
H 1.3654097 2.4628839 1.0132318  
C 5.2382844 2.0232543 1.0640368  
H 4.8576238 -0.0656879 1.4266526  
C 4.6789058 3.2997451 0.8502861  
H 2.8141735 4.4224431 0.6635687  
H 6.3277453 1.9225360 1.0623999  
N 1.1121444 0.0930749 2.5632992  
N 0.2019084 -1.4112254 0.4915640  
O 5.1069239 -2.6902212 -3.5622083  
O 5.5676646 4.3180702 0.6661412  
C 5.0630295 5.6295440 0.4396244  
H 5.9449878 6.2761858 0.3230754  
H 4.4498355 5.6749258 -0.4803965  
H 4.4586893 5.9851453 1.2960805  
C 5.4702162 -1.9933698 -4.7487950  
H 6.1940734 -2.6382714 -5.2680527  
H 4.5933388 -1.8239348 -5.4022077  
H 5.9454895 -1.0205332 -4.5180719  
C -0.8642239 -1.7679559 -0.3472766  
O -1.5461970 -2.7502551 -0.1244039  
C -1.0678007 -0.8946622 -1.5896965  
C -1.6155301 0.4083143 -1.5622413  
C -0.6837676 -1.4554200 -2.8278151  
C -1.6553505 1.1817970 -2.7427793  
C -0.8077770 -0.7215789 -4.0258849  
C -1.2750002 0.6102976 -3.9793999



|    |            |            |            |
|----|------------|------------|------------|
| S  | -2.2249807 | 1.1026600  | 0.0447326  |
| O  | -2.4544549 | -0.1123773 | 0.9240366  |
| O  | -0.9996904 | 1.8206549  | 0.6041552  |
| O  | -3.4175818 | 1.9119342  | -0.2318019 |
| C  | 1.4743138  | 0.0845066  | 3.8136663  |
| C  | 0.4370561  | 0.4011528  | 4.8221470  |
| C  | 2.8879152  | -0.1851604 | 4.2961725  |
| C  | 0.7736219  | 0.6485450  | 6.2006629  |
| H  | -0.4023833 | 0.9905457  | 4.4229748  |
| C  | 2.9921347  | -0.4785656 | 5.8010586  |
| C  | 2.2202865  | 0.5479564  | 6.6373778  |
| H  | 2.6612845  | 1.5572919  | 6.4958691  |
| H  | 2.2879825  | 0.3287709  | 7.7171939  |
| Li | -0.7393049 | 0.2409209  | 1.8004132  |
| H  | 0.3903007  | -2.1669036 | 1.1575220  |
| C  | -0.0549136 | -0.9499297 | 7.3265121  |
| C  | -1.2512745 | -1.1811446 | 6.5908951  |
| C  | -0.1025653 | -0.5189428 | 8.7304041  |
| C  | -2.5268551 | -0.8251418 | 7.1874516  |
| C  | -3.7573085 | -0.9485779 | 6.5004338  |
| C  | -2.5226193 | -0.3418279 | 8.5192815  |
| C  | -4.9500145 | -0.6057354 | 7.1334234  |
| H  | -3.7390602 | -1.3168448 | 5.4703375  |
| C  | -3.7233872 | -0.0014345 | 9.1604316  |
| C  | -4.9279608 | -0.1361773 | 8.4636034  |
| H  | -5.9012355 | -0.6993101 | 6.6010846  |
| H  | -3.6889983 | 0.3673279  | 10.1890176 |
| H  | -5.8660242 | 0.1310112  | 8.9612106  |
| O  | -1.3626043 | -0.1704000 | 9.2330433  |
| O  | 0.8509912  | -0.3995630 | 9.4702794  |
| O  | -1.1535017 | -1.5356741 | 5.3486883  |
| H  | -0.3040835 | -0.7849281 | 4.9311612  |
| H  | 0.1751207  | 1.4067427  | 6.7187465  |
| H  | 0.8132650  | -1.5653654 | 7.0781166  |
| H  | 3.3358829  | -1.0061126 | 3.7079398  |
| H  | 3.4829167  | 0.7143015  | 4.0399663  |
| H  | 4.0529508  | -0.4926410 | 6.1024466  |
| H  | 2.6011325  | -1.4937090 | 6.0087492  |
| Br | -2.1282915 | 3.0175615  | -2.7002417 |
| Br | -1.3835860 | 1.6223353  | -5.5767881 |
| Br | -0.3225929 | -1.5038190 | -5.6794989 |
| Br | 0.0245628  | -3.2183196 | -2.8831091 |

**14h**, pro(R)

|            |                 |           |            |
|------------|-----------------|-----------|------------|
| E(SCF+ZPE) | =-12951.9681151 | vi1032.41 |            |
| C          | 1.5470895       | 1.9543931 | -0.7089262 |
| H          | 0.7910042       | 2.6597784 | -0.3347313 |
| C          | 1.9145315       | 0.9765515 | 0.4505611  |
| H          | 2.5600632       | 0.1784915 | 0.0432105  |
| C          | 2.7374771       | 2.7810791 | -1.1840881 |

|    |            |            |            |
|----|------------|------------|------------|
| C  | 4.0058031  | 2.2086745  | -1.4229585 |
| C  | 2.5631342  | 4.1468539  | -1.4667811 |
| C  | 5.0644959  | 2.9764582  | -1.9098580 |
| H  | 4.1802500  | 1.1447973  | -1.2256668 |
| C  | 3.6177701  | 4.9320043  | -1.9544618 |
| H  | 1.5736800  | 4.5943413  | -1.3240859 |
| C  | 4.8798996  | 4.3486778  | -2.1765637 |
| H  | 6.0504344  | 2.5379281  | -2.0914082 |
| H  | 3.4401036  | 5.9905428  | -2.1618132 |
| C  | 2.6532147  | 1.6950135  | 1.5801579  |
| C  | 2.1475614  | 2.8845729  | 2.1401301  |
| C  | 3.8407602  | 1.1661820  | 2.1267697  |
| C  | 2.7893846  | 3.5226885  | 3.2125359  |
| H  | 1.2519458  | 3.3646271  | 1.7222866  |
| C  | 4.4942084  | 1.7889587  | 3.1916638  |
| H  | 4.2775184  | 0.2561484  | 1.6986030  |
| C  | 3.9706678  | 2.9738080  | 3.7488820  |
| H  | 2.3672703  | 4.4507392  | 3.6061909  |
| H  | 5.4209556  | 1.3826950  | 3.6075095  |
| N  | 0.6678157  | 0.4120192  | 1.0206430  |
| N  | 0.9625086  | 1.2799498  | -1.8995596 |
| O  | 5.9737878  | 5.0177926  | -2.6457218 |
| O  | 4.6757699  | 3.5108587  | 4.7854159  |
| C  | 4.2066721  | 4.7199213  | 5.3718799  |
| H  | 4.9197552  | 4.9631064  | 6.1729511  |
| H  | 4.1855995  | 5.5457690  | 4.6354033  |
| H  | 3.1960839  | 4.5947588  | 5.8059918  |
| C  | 5.8441834  | 6.4019831  | -2.9464429 |
| H  | 6.8318839  | 6.7272384  | -3.3049997 |
| H  | 5.0904051  | 6.5768500  | -3.7379133 |
| H  | 5.5689873  | 6.9888622  | -2.0488281 |
| C  | -0.3430364 | 1.3269982  | -2.3648421 |
| O  | -0.6029528 | 1.3821693  | -3.5585108 |
| C  | -1.4988511 | 0.9447557  | -1.4230425 |
| C  | -2.3004162 | 1.8419954  | -0.6829573 |
| C  | -1.8794768 | -0.4190977 | -1.4687896 |
| C  | -3.4273100 | 1.3715794  | 0.0309794  |
| C  | -3.0360574 | -0.8833780 | -0.8144198 |
| C  | -3.8203143 | 0.0179124  | -0.0595455 |
| S  | -1.7323123 | 3.6071130  | -0.4981907 |
| O  | -2.8942210 | 4.5041020  | -0.5605707 |
| O  | -1.1021240 | 3.5007084  | 0.9069735  |
| O  | -0.6977975 | 3.7733754  | -1.5551143 |
| C  | 0.5862749  | -0.8440589 | 1.3734292  |
| C  | 1.6655695  | -1.8324089 | 1.3134466  |
| C  | -0.7268975 | -1.3335297 | 1.9574319  |
| C  | 1.5072410  | -3.1533051 | 1.9065202  |
| C  | -0.4669687 | -2.1850629 | 3.2098108  |
| C  | 0.3165855  | -3.4525212 | 2.8368758  |
| Li | -0.6154900 | 1.8561631  | 1.5108536  |
| H  | 1.5846604  | 1.3498355  | -2.7106275 |

|    |            |            |            |
|----|------------|------------|------------|
| C  | 1.2465581  | -4.4365077 | 0.4241709  |
| C  | 2.3191566  | -4.0609917 | -0.4497340 |
| C  | 1.2054397  | -5.8109128 | 0.9661826  |
| C  | 3.4830347  | -4.9121894 | -0.5638886 |
| C  | 4.6266776  | -4.5621750 | -1.3227379 |
| C  | 3.4634785  | -6.1526875 | 0.1233734  |
| C  | 5.7148076  | -5.4279660 | -1.3908786 |
| H  | 4.6247820  | -3.6017060 | -1.8464579 |
| C  | 4.5587519  | -7.0270332 | 0.0528460  |
| C  | 5.6761268  | -6.6592208 | -0.7019216 |
| H  | 6.5978795  | -5.1567257 | -1.9769724 |
| H  | 4.5130073  | -7.9761414 | 0.5934569  |
| H  | 6.5318106  | -7.3400962 | -0.7570379 |
| O  | 2.3943953  | -6.5515862 | 0.8817208  |
| O  | 0.2601010  | -6.3292198 | 1.5139571  |
| O  | 2.2951421  | -2.8691324 | -0.9629630 |
| H  | 1.8472112  | -2.2163849 | -0.1349449 |
| H  | 0.1001791  | -1.5852976 | 3.9462005  |
| H  | -1.4209142 | -2.4692302 | 3.6860836  |
| H  | 0.7069438  | -3.9471676 | 3.7425619  |
| H  | -0.3697311 | -4.1860955 | 2.3784802  |
| H  | -1.3809167 | -0.4723293 | 2.1818542  |
| H  | -1.2621487 | -1.9417050 | 1.2023017  |
| H  | 2.4538188  | -3.5744909 | 2.2669392  |
| H  | 0.2537665  | -4.0613852 | 0.1550603  |
| H  | 2.6859868  | -1.4320955 | 1.3408191  |
| Br | -4.4115737 | 2.5261920  | 1.1758587  |
| Br | -5.3645302 | -0.6036839 | 0.8454241  |
| Br | -3.5240426 | -2.7140242 | -0.9061595 |
| Br | -0.7874341 | -1.6613898 | -2.4130998 |

Transition structures **14a-h** (BP86/SVP+ZPE)

**TS 14a pro (R)**

E(SCF+ZPE)=-12953.2812955  $v_i=810$

|   |            |            |            |
|---|------------|------------|------------|
| C | -0.7665027 | -2.6999797 | -0.5102419 |
| H | -0.1621892 | -3.4106268 | 0.0879811  |
| C | -2.1476099 | -2.5328458 | 0.2496947  |
| H | -2.8107987 | -3.2946110 | -0.2135299 |
| C | -0.9628845 | -3.2679984 | -1.9078578 |
| C | -1.7345729 | -2.5882183 | -2.8823173 |
| C | -0.3806733 | -4.4957955 | -2.2712081 |
| C | -1.9124309 | -3.1166095 | -4.1633286 |
| H | -2.2123987 | -1.6276074 | -2.6303024 |
| C | -0.5539930 | -5.0455401 | -3.5533454 |
| H | 0.2278840  | -5.0441191 | -1.5348836 |
| C | -1.3240312 | -4.3545980 | -4.5123682 |

|    |            |            |            |
|----|------------|------------|------------|
| H  | -2.5096126 | -2.5902475 | -4.9222696 |
| H  | -0.0816489 | -6.0078107 | -3.7927017 |
| C  | -2.0731409 | -2.8843087 | 1.7367134  |
| C  | -1.3818607 | -2.0911194 | 2.6745072  |
| C  | -2.7094040 | -4.0574519 | 2.2055408  |
| C  | -1.3340230 | -2.4449362 | 4.0323993  |
| H  | -0.8411875 | -1.1832427 | 2.3668422  |
| C  | -2.6685525 | -4.4246413 | 3.5543714  |
| H  | -3.2441277 | -4.7077710 | 1.4930880  |
| C  | -1.9802378 | -3.6152884 | 4.4849154  |
| H  | -0.7753725 | -1.8005478 | 4.7240902  |
| H  | -3.1628712 | -5.3380485 | 3.9160833  |
| N  | -2.6750588 | -1.1788994 | 0.0365931  |
| N  | 0.0371187  | -1.4524244 | -0.5876336 |
| O  | -1.5577713 | -4.7905989 | -5.7810828 |
| O  | -1.9934979 | -4.0434929 | 5.7788548  |
| C  | -1.3048706 | -3.2761527 | 6.7538086  |
| H  | -1.4444744 | -3.8005301 | 7.7171226  |
| H  | -0.2162358 | -3.2069302 | 6.5343943  |
| H  | -1.7183692 | -2.2464466 | 6.8396148  |
| C  | -0.9895477 | -6.0242943 | -6.1920376 |
| H  | -1.3019883 | -6.1760798 | -7.2414108 |
| H  | 0.1221397  | -6.0044398 | -6.1456843 |
| H  | -1.3596935 | -6.8761150 | -5.5786317 |
| C  | 1.2160937  | -1.3197959 | 0.1594674  |
| O  | 1.4869296  | -2.0139119 | 1.1218823  |
| C  | 2.1951620  | -0.2842708 | -0.4179358 |
| C  | 2.0545558  | 1.1182174  | -0.2760439 |
| C  | 3.2980012  | -0.8010112 | -1.1360591 |
| C  | 2.9791671  | 1.9863231  | -0.9026310 |
| C  | 4.2754019  | 0.0560018  | -1.6898065 |
| C  | 4.1105718  | 1.4571643  | -1.5762514 |
| S  | 0.5788972  | 1.7802307  | 0.6483865  |
| O  | 0.9631742  | 3.0147983  | 1.3495470  |
| O  | -0.4821321 | 1.8912398  | -0.4430657 |
| O  | 0.1624496  | 0.6297156  | 1.5518263  |
| C  | -3.9602321 | -0.9427887 | -0.0337958 |
| C  | -4.3821432 | 0.4439975  | -0.2730115 |
| C  | -5.0300815 | -2.0155771 | 0.0868965  |
| C  | -5.7459104 | 0.7986096  | -0.6017745 |
| H  | -3.5916252 | 1.0957998  | -0.6886403 |
| C  | -6.4538397 | -1.4641063 | 0.2582028  |
| H  | -4.9718613 | -2.6367441 | -0.8368647 |
| H  | -4.7745587 | -2.6957124 | 0.9244247  |
| C  | -6.7593427 | -0.3279040 | -0.7212331 |
| H  | -7.1911022 | -2.2833901 | 0.1394845  |
| H  | -6.5819405 | -1.0982108 | 1.3020831  |
| H  | -7.7905560 | 0.0586441  | -0.5911019 |
| H  | -6.6992722 | -0.7034682 | -1.7690099 |
| Li | -1.2560210 | 0.2037841  | 0.2294473  |
| H  | 0.0906598  | -1.0406748 | -1.5268025 |

|    |            |            |            |
|----|------------|------------|------------|
| H  | -5.8544058 | 1.5957662  | -1.3566342 |
| C  | -7.6994503 | 2.6039240  | 0.4287742  |
| C  | -6.5036801 | 1.8839634  | 0.9137710  |
| C  | -6.4425901 | 4.6837959  | 0.5848808  |
| C  | -6.4545393 | 6.0714051  | 0.3636822  |
| C  | -5.3008569 | 4.0516459  | 1.1465626  |
| C  | -5.3202260 | 6.8250245  | 0.6910057  |
| H  | -7.3535145 | 6.5314842  | -0.0700313 |
| C  | -4.1613521 | 4.8337696  | 1.4638877  |
| C  | -4.1709164 | 6.2102108  | 1.2366718  |
| H  | -5.3276528 | 7.9111376  | 0.5136747  |
| H  | -3.2798164 | 4.3258630  | 1.8815344  |
| H  | -3.2844702 | 6.8142178  | 1.4782036  |
| H  | -4.2628229 | 1.0760259  | 1.0688949  |
| Br | 3.4436655  | -2.6848541 | -1.3963879 |
| Br | 5.7769785  | -0.6626457 | -2.5933826 |
| Br | 5.3994682  | 2.6151597  | -2.3447813 |
| Br | 2.7122571  | 3.8651902  | -0.9292056 |
| H  | -6.7562014 | 0.9823018  | 1.4917186  |
| O  | -7.5642342 | 3.9826131  | 0.2256365  |
| O  | -4.3357595 | 1.9520828  | 1.7967727  |
| C  | -5.3632650 | 2.6218967  | 1.3672161  |
| O  | -8.7667831 | 2.0966663  | 0.1543905  |

**TS 14b pro (S)**

E(SCF+ZPE)=-12953.2788668  $v_i=948$

|   |            |            |            |
|---|------------|------------|------------|
| C | 1.3464723  | -0.9146894 | -0.7233600 |
| H | 2.4355927  | -0.7397127 | -0.8248902 |
| C | 1.1649668  | -2.1646211 | 0.2290973  |
| H | 1.0964148  | -3.0438438 | -0.4447283 |
| C | 0.7639306  | -1.1742064 | -2.1064382 |
| C | -0.6322286 | -1.2644379 | -2.3253653 |
| C | 1.6116442  | -1.3439106 | -3.2161813 |
| C | -1.1543406 | -1.5107067 | -3.5978954 |
| H | -1.3347304 | -1.1365426 | -1.4855079 |
| C | 1.1055710  | -1.5974127 | -4.5032960 |
| H | 2.7018377  | -1.2705707 | -3.0781303 |
| C | -0.2882430 | -1.6817173 | -4.7029287 |
| H | -2.2387334 | -1.5713565 | -3.7709629 |
| H | 1.8059121  | -1.7171082 | -5.3406935 |
| C | 2.3456617  | -2.4332565 | 1.1665232  |
| C | 3.0538595  | -1.4102536 | 1.8278893  |
| C | 2.7134135  | -3.7730830 | 1.4351066  |
| C | 4.0916907  | -1.7058677 | 2.7289566  |
| H | 2.8329248  | -0.3481365 | 1.6455836  |
| C | 3.7442953  | -4.0812691 | 2.3258602  |
| H | 2.1805313  | -4.5976972 | 0.9362013  |
| C | 4.4435217  | -3.0464235 | 2.9884125  |
| H | 4.6152472  | -0.8728371 | 3.2165025  |
| H | 4.0323126  | -5.1229514 | 2.5294361  |
| N | -0.0453491 | -1.9983570 | 1.0489477  |

|    |            |             |            |
|----|------------|-------------|------------|
| N  | 0.8043476  | 0.3389440   | -0.1576676 |
| O  | -0.8891885 | -1.9170997  | -5.9019765 |
| O  | 5.4306239  | -3.4389785  | 3.8414884  |
| C  | 6.1569092  | -2.4397590  | 4.5410174  |
| H  | 6.8911454  | -2.9739862  | 5.1715673  |
| H  | 6.7015198  | -1.7611152  | 3.8476203  |
| H  | 5.4957386  | -1.8276127  | 5.1937508  |
| C  | -0.0737828 | -2.0698426  | -7.0531038 |
| H  | -0.7620243 | -2.2405066  | -7.9010425 |
| H  | 0.5309499  | -1.1581276  | -7.2560965 |
| H  | 0.6116178  | -2.9422550  | -6.9631118 |
| C  | 1.6251698  | 1.4498244   | 0.0450292  |
| O  | 2.8433618  | 1.3918531   | 0.0861613  |
| C  | 0.8522569  | 2.7741318   | 0.1101184  |
| C  | 0.0948505  | 3.1952926   | 1.2295252  |
| C  | 0.9028709  | 3.5903792   | -1.0432331 |
| C  | -0.6576165 | 4.3916217   | 1.1601353  |
| C  | 0.2331580  | 4.8340701   | -1.0848936 |
| C  | -0.5574087 | 5.2313059   | 0.0204365  |
| S  | 0.0457357  | 2.1114496   | 2.7440957  |
| O  | -0.0187253 | 2.9775765   | 3.9306945  |
| O  | -1.1419858 | 1.1923024   | 2.4725955  |
| O  | 1.2975629  | 1.2545436   | 2.6403533  |
| C  | -1.0581569 | -2.8211166  | 1.0283915  |
| C  | -1.1976589 | -3.9924942  | 0.1384759  |
| C  | -2.2128606 | -2.4973090  | 1.9704571  |
| C  | -2.4498325 | -4.7075167  | 0.0227738  |
| H  | -0.5939017 | -3.9611437  | -0.7844247 |
| C  | -3.1953922 | -3.6544760  | 2.1873418  |
| C  | -3.6368667 | -4.2603375  | 0.8525330  |
| H  | -4.1712481 | -3.4903633  | 0.2477784  |
| H  | -4.3579184 | -5.0919090  | 0.9893897  |
| Li | 0.1446462  | -0.2538226  | 2.0437190  |
| H  | -0.1609010 | 0.5649432   | -0.4205668 |
| C  | -2.1546272 | -6.6149477  | 0.7768380  |
| C  | -0.8104874 | -6.8748111  | 0.3752919  |
| C  | -3.2546340 | -7.4727347  | 0.3012006  |
| C  | -0.5517427 | -7.8796312  | -0.6406132 |
| C  | 0.7437322  | -8.1565433  | -1.1437186 |
| C  | -1.6578702 | -8.6232400  | -1.1325081 |
| C  | 0.9285363  | -9.1509032  | -2.1050338 |
| H  | 1.5888987  | -7.5717343  | -0.7531534 |
| C  | -1.4713746 | -9.6284397  | -2.0980378 |
| C  | -0.1817669 | -9.8857164  | -2.5780932 |
| H  | 1.9352834  | -9.3643510  | -2.4926283 |
| H  | -2.3475793 | -10.1868141 | -2.4562899 |
| H  | -0.0359232 | -10.6718444 | -3.3342802 |
| O  | -2.9387099 | -8.3965854  | -0.7069616 |
| O  | -4.4084486 | -7.4206372  | 0.6713805  |
| O  | 0.1232801  | -6.0830003  | 0.8094242  |
| H  | -0.3597486 | -5.0195152  | 0.7303582  |

|    |            |            |            |
|----|------------|------------|------------|
| H  | -2.6990907 | -5.0652936 | -0.9903003 |
| H  | -2.3019731 | -6.2405421 | 1.7999568  |
| Br | -1.8708112 | 4.8764489  | 2.5362093  |
| Br | 1.8526855  | 2.9787454  | -2.5790576 |
| Br | 0.3726168  | 5.9441898  | -2.6131857 |
| Br | -1.4910422 | 6.8799657  | -0.0417306 |
| H  | -1.8036042 | -2.1301332 | 2.9331986  |
| H  | -2.7559458 | -1.6302399 | 1.5301295  |
| H  | -2.7208088 | -4.4404168 | 2.8174031  |
| H  | -4.0756297 | -3.3004350 | 2.7599650  |

**TS 14c pro (S)**

E(SCF+ZPE)=-12953.2791288  $v_i=787$

|   |            |            |            |
|---|------------|------------|------------|
| C | -0.5889170 | -2.8398049 | -0.3537237 |
| H | -0.0306061 | -3.7975515 | -0.2469838 |
| C | -1.4778522 | -2.6994291 | 0.9461743  |
| H | -2.1916616 | -3.5511212 | 0.8915265  |
| C | -1.4759989 | -2.9595176 | -1.5845911 |
| C | -1.8875688 | -1.8688285 | -2.3837667 |
| C | -1.9998800 | -4.2301796 | -1.8877053 |
| C | -2.7988978 | -2.0483868 | -3.4280146 |
| H | -1.4526910 | -0.8684562 | -2.2413767 |
| C | -2.9169717 | -4.4283181 | -2.9343312 |
| H | -1.6781220 | -5.1055459 | -1.2992679 |
| C | -3.3293533 | -3.3262590 | -3.7118634 |
| H | -3.1048076 | -1.2019310 | -4.0593943 |
| H | -3.2878907 | -5.4414731 | -3.1395590 |
| C | -0.6512202 | -2.8783433 | 2.2223820  |
| C | -0.1373993 | -1.7908254 | 2.9573112  |
| C | -0.3402179 | -4.1841378 | 2.6720511  |
| C | 0.6656237  | -1.9874078 | 4.0963572  |
| H | -0.3700714 | -0.7591164 | 2.6509918  |
| C | 0.4520805  | -4.3960964 | 3.8014373  |
| H | -0.7349168 | -5.0565653 | 2.1257596  |
| C | 0.9687057  | -3.2959441 | 4.5261384  |
| H | 1.0444602  | -1.1101517 | 4.6375772  |
| H | 0.6878115  | -5.4108583 | 4.1536723  |
| N | -2.1527360 | -1.4063261 | 0.9059856  |
| N | 0.3670472  | -1.7183009 | -0.3363765 |
| O | -4.2107075 | -3.3961229 | -4.7513887 |
| O | 1.7296727  | -3.6013076 | 5.6118204  |
| C | 2.2872835  | -2.5404453 | 6.3730388  |
| H | 2.8657982  | -3.0138072 | 7.1872318  |
| H | 2.9704265  | -1.9087568 | 5.7631809  |
| H | 1.5000149  | -1.8925415 | 6.8186049  |
| C | -4.7437445 | -4.6606263 | -5.1022784 |
| H | -5.4178676 | -4.4881226 | -5.9615583 |
| H | -3.9485580 | -5.3778348 | -5.4063578 |
| H | -5.3302701 | -5.1118839 | -4.2699607 |
| C | 1.2132731  | -1.3519450 | -1.3897186 |
| O | 1.1076281  | -1.7275669 | -2.5401729 |

|    |            |            |            |
|----|------------|------------|------------|
| C  | 2.3765611  | -0.4551646 | -0.9202884 |
| C  | 2.2533805  | 0.9198629  | -0.6024908 |
| C  | 3.6384326  | -1.0821354 | -0.8121676 |
| C  | 3.3793642  | 1.6344836  | -0.1283726 |
| C  | 4.7867752  | -0.3539656 | -0.4303826 |
| C  | 4.6534135  | 1.0114768  | -0.0829806 |
| S  | 0.5782379  | 1.7370493  | -0.6991897 |
| O  | 0.7560043  | 3.1285041  | -1.1424205 |
| O  | -0.2290382 | 0.8612965  | -1.6437659 |
| O  | 0.0132850  | 1.5106690  | 0.7021207  |
| C  | -3.3615704 | -1.2404398 | 1.3761512  |
| C  | -3.9040240 | 0.1248565  | 1.3839817  |
| C  | -4.2089811 | -2.3587291 | 1.9596463  |
| C  | -5.1388928 | 0.4710785  | 2.0527353  |
| H  | -3.1341443 | 0.9173816  | 1.3342879  |
| C  | -5.6893532 | -1.9906738 | 2.1400935  |
| C  | -5.8664082 | -0.6266438 | 2.8122338  |
| H  | -5.4282410 | -0.6492451 | 3.8366200  |
| H  | -6.9377919 | -0.3712217 | 2.9398685  |
| Li | -1.0478175 | 0.0096407  | -0.0270787 |
| H  | 0.7971866  | -1.5914758 | 0.5907853  |
| C  | -6.4943679 | 0.9859464  | 0.6621514  |
| C  | -5.6940203 | 1.6487478  | -0.3230989 |
| C  | -7.5996466 | 1.7147082  | 1.3198074  |
| C  | -5.8269854 | 3.0779535  | -0.5126928 |
| C  | -4.9989860 | 3.8216306  | -1.3916078 |
| C  | -6.8391261 | 3.7507989  | 0.2235398  |
| C  | -5.1858488 | 5.1964323  | -1.5358341 |
| H  | -4.2129946 | 3.2864774  | -1.9437693 |
| C  | -7.0323302 | 5.1343405  | 0.0717985  |
| C  | -6.2054800 | 5.8475307  | -0.8054015 |
| H  | -4.5392274 | 5.7724736  | -2.2132968 |
| H  | -7.8246046 | 5.6262538  | 0.6531871  |
| H  | -6.3532080 | 6.9320576  | -0.9204619 |
| O  | -7.6538208 | 3.0980311  | 1.1113714  |
| O  | -8.4303234 | 1.2242772  | 2.0554519  |
| O  | -4.7392704 | 0.9727230  | -0.8904266 |
| H  | -4.3002767 | 0.3546981  | -0.0430425 |
| H  | -5.1353189 | 1.4513257  | 2.5586392  |
| H  | -6.7448691 | -0.0647950 | 0.4529141  |
| Br | 3.7784640  | -2.9573237 | -1.1389886 |
| Br | 6.4794847  | -1.2019425 | -0.3613560 |
| Br | 6.1833286  | 1.9900062  | 0.4622714  |
| Br | 3.2230891  | 3.4088364  | 0.5293832  |
| H  | -4.1108817 | -3.2706548 | 1.3353074  |
| H  | -3.7559241 | -2.6226793 | 2.9426710  |
| H  | -6.1919356 | -1.9836723 | 1.1467296  |
| H  | -6.2037550 | -2.7775604 | 2.7276309  |

**TS 14d** pro (R)

E(SCF+ZPE)=-12953.2806147  $v_i=920$



|   |            |            |            |
|---|------------|------------|------------|
| C | 0.9620879  | -0.9363443 | 0.4732094  |
| H | 1.3334720  | -0.6558932 | 1.4793434  |
| C | -0.0903589 | -2.0969278 | 0.7045342  |
| H | 0.5140365  | -3.0292923 | 0.6451107  |
| C | 2.1384847  | -1.3917736 | -0.3774050 |
| C | 3.4503390  | -1.3732703 | 0.1478264  |
| C | 1.9671342  | -1.8371870 | -1.7040314 |
| C | 4.5452437  | -1.7855384 | -0.6160359 |
| H | 3.6146149  | -1.0248469 | 1.1797091  |
| C | 3.0574976  | -2.2488804 | -2.4893716 |
| H | 0.9569492  | -1.8746889 | -2.1419980 |
| C | 4.3600559  | -2.2269404 | -1.9456501 |
| H | 5.5662107  | -1.7707129 | -0.2074525 |
| H | 2.8798882  | -2.5874755 | -3.5190257 |
| C | -0.7069841 | -2.0800093 | 2.1046681  |
| C | -1.7256768 | -1.1827861 | 2.4802970  |
| C | -0.2247870 | -2.9818302 | 3.0817641  |
| C | -2.2558928 | -1.1883346 | 3.7805340  |
| H | -2.1147819 | -0.4385103 | 1.7697848  |
| C | -0.7389834 | -2.9954713 | 4.3823047  |
| H | 0.5795058  | -3.6893720 | 2.8191290  |
| C | -1.7657260 | -2.0956776 | 4.7438193  |
| H | -3.0416267 | -0.4636130 | 4.0315218  |
| H | -0.3627555 | -3.6964154 | 5.1416826  |
| N | -1.1066700 | -2.0885807 | -0.3579558 |
| N | 0.3826030  | 0.3003185  | -0.1146561 |
| O | 5.4851038  | -2.6064371 | -2.6127377 |
| O | -2.2115458 | -2.1786047 | 6.0295603  |
| C | -3.2261632 | -1.2817697 | 6.4532382  |
| H | -3.4249706 | -1.5169643 | 7.5151543  |
| H | -2.9020255 | -0.2206278 | 6.3719216  |
| H | -4.1661308 | -1.4133124 | 5.8720066  |
| C | 5.3655889  | -3.0480023 | -3.9555106 |
| H | 6.3890398  | -3.2926379 | -4.2943502 |
| H | 4.7308799  | -3.9584956 | -4.0378648 |
| H | 4.9461783  | -2.2571055 | -4.6166965 |
| C | 0.1371072  | 1.4172090  | 0.6993389  |
| O | 0.0590006  | 1.3620595  | 1.9121425  |
| C | 0.0926003  | 2.7442687  | -0.0740379 |
| C | -1.0132131 | 3.1852010  | -0.8416204 |
| C | 1.2469772  | 3.5557696  | 0.0118984  |
| C | -0.9330009 | 4.4038307  | -1.5560098 |
| C | 1.3024464  | 4.8155422  | -0.6255751 |
| C | 0.2063011  | 5.2390344  | -1.4149176 |
| S | -2.4986006 | 2.0692609  | -0.9859175 |
| O | -3.7096951 | 2.8936507  | -1.1080035 |
| O | -2.1263279 | 1.1751912  | -2.1652240 |
| O | -2.4354449 | 1.1999281  | 0.2610460  |
| C | -1.7326852 | -3.1849603 | -0.6939435 |
| C | -1.5183150 | -4.4995742 | -0.0637901 |
| C | -2.8016032 | -3.0735360 | -1.7716311 |

|    |            |             |            |
|----|------------|-------------|------------|
| C  | -2.3206342 | -5.6505699  | -0.4182714 |
| C  | -3.1146005 | -4.4039679  | -2.4678792 |
| C  | -3.4286564 | -5.4975628  | -1.4422474 |
| Li | -1.6448940 | -0.2323371  | -0.8639714 |
| H  | 0.7633775  | 0.5397625   | -1.0384768 |
| C  | -1.0825678 | -6.9882457  | -1.3848471 |
| C  | 0.1414028  | -6.8208396  | -0.6678566 |
| C  | -1.7528662 | -8.3009132  | -1.4160517 |
| C  | 0.6258544  | -7.8992231  | 0.1752024  |
| C  | 1.7962408  | -7.7939627  | 0.9674781  |
| C  | -0.1104407 | -9.1138684  | 0.1857534  |
| C  | 2.2201950  | -8.8733440  | 1.7436560  |
| H  | 2.3515991  | -6.8452113  | 0.9462100  |
| C  | 0.3184352  | -10.2029921 | 0.9649670  |
| C  | 1.4788662  | -10.0764579 | 1.7380315  |
| H  | 3.1284691  | -8.7897924  | 2.3578602  |
| H  | -0.2727014 | -11.1293634 | 0.9511420  |
| H  | 1.8136373  | -10.9287627 | 2.3484794  |
| O  | -1.2582613 | -9.2794989  | -0.5411532 |
| O  | -2.7148351 | -8.5917027  | -2.0951699 |
| O  | 0.6977768  | -5.6477611  | -0.6613931 |
| H  | -0.2034265 | -4.9181893  | -0.5378958 |
| H  | -4.3445079 | -5.2212398  | -0.8690778 |
| H  | -3.6568249 | -6.4689527  | -1.9269024 |
| H  | -2.5530039 | -6.3371012  | 0.4129659  |
| H  | -1.1862995 | -6.4235843  | -2.3222682 |
| H  | -1.1798426 | -4.4620650  | 0.9860240  |
| H  | -3.7248380 | -2.7024613  | -1.2690735 |
| H  | -2.5149257 | -2.2896438  | -2.5020802 |
| H  | -2.2501008 | -4.7128169  | -3.0987597 |
| H  | -3.9660626 | -4.2771711  | -3.1657346 |
| Br | 2.7692054  | 2.9160702   | 0.9677316  |
| Br | 2.8344704  | 5.9137358   | -0.4413622 |
| Br | 0.2817822  | 6.9162954   | -2.2949017 |
| Br | -2.2933094 | 4.9345120   | -2.7680057 |

### TS 14e pro (R)

E(SCF+ZPE)=-12953.2590114  $v_i=836$

|   |            |            |            |
|---|------------|------------|------------|
| C | -0.0923668 | -1.3774842 | -0.6266275 |
| H | 0.1212844  | -0.3105860 | -0.4282562 |
| C | -1.4660145 | -1.4028621 | -1.4322776 |
| H | -1.1607888 | -1.1530280 | -2.4742343 |
| C | -0.1338847 | -2.0778778 | 0.7257874  |
| C | 0.3348932  | -3.3972422 | 0.9029350  |
| C | -0.6649224 | -1.4111191 | 1.8453833  |
| C | 0.2610574  | -4.0309705 | 2.1456091  |
| H | 0.7829622  | -3.9297268 | 0.0517311  |
| C | -0.7510387 | -2.0332237 | 3.1033166  |
| H | -1.0228525 | -0.3747704 | 1.7404187  |
| C | -0.2863563 | -3.3561741 | 3.2597331  |
| H | 0.6333166  | -5.0561440 | 2.2874399  |

|    |            |            |            |
|----|------------|------------|------------|
| H  | -1.1634591 | -1.4718979 | 3.9527016  |
| C  | -2.0841203 | -2.7935215 | -1.4551372 |
| C  | -2.7871841 | -3.3238836 | -0.3541693 |
| C  | -1.9126554 | -3.6234084 | -2.5882296 |
| C  | -3.3149430 | -4.6251825 | -0.3776764 |
| H  | -2.9323948 | -2.7085561 | 0.5458870  |
| C  | -2.4191321 | -4.9265792 | -2.6238635 |
| H  | -1.3845354 | -3.2326070 | -3.4738559 |
| C  | -3.1280273 | -5.4417289 | -1.5155728 |
| H  | -3.8579730 | -4.9971223 | 0.5014860  |
| H  | -2.2854409 | -5.5691301 | -3.5060780 |
| N  | -2.2969624 | -0.2821276 | -0.9600439 |
| N  | 0.9637367  | -1.8437781 | -1.5185794 |
| O  | -0.3119386 | -4.0547005 | 4.4319451  |
| O  | -3.5908053 | -6.7162176 | -1.6393643 |
| C  | -4.2994178 | -7.2922240 | -0.5536288 |
| H  | -4.5694926 | -8.3169712 | -0.8678226 |
| H  | -3.6751296 | -7.3481052 | 0.3656262  |
| H  | -5.2309588 | -6.7293129 | -0.3205807 |
| C  | -0.8143431 | -3.4130640 | 5.5910842  |
| H  | -0.7346364 | -4.1473441 | 6.4138771  |
| H  | -0.2211212 | -2.5091643 | 5.8562854  |
| H  | -1.8814325 | -3.1168668 | 5.4747580  |
| C  | 2.0273489  | -1.0916599 | -1.9704731 |
| O  | 2.6203127  | -1.3343109 | -3.0121853 |
| C  | 2.6296396  | -0.0588035 | -0.9973969 |
| C  | 2.4172353  | 1.3373442  | -1.0643589 |
| C  | 3.6242773  | -0.5506136 | -0.1145170 |
| C  | 3.1988632  | 2.2255787  | -0.2867775 |
| C  | 4.3825793  | 0.3215179  | 0.6977766  |
| C  | 4.1771382  | 1.7196962  | 0.6011563  |
| S  | 1.0710475  | 2.0413819  | -2.1145952 |
| O  | 1.6920895  | 2.8876918  | -3.1438765 |
| O  | 0.2718343  | 0.8394478  | -2.6162027 |
| O  | 0.1480425  | 2.7332643  | -1.1050647 |
| C  | -3.5139121 | -0.0440366 | -1.3844974 |
| C  | -4.1554617 | 1.1864931  | -0.8845543 |
| C  | -4.2615585 | -0.8709188 | -2.4170072 |
| C  | -5.2949010 | 1.7889100  | -1.5424805 |
| H  | -3.4717123 | 1.8721495  | -0.3493802 |
| C  | -5.7034784 | -0.4157246 | -2.6884688 |
| H  | -3.6573088 | -0.8125067 | -3.3516670 |
| H  | -4.2321803 | -1.9401787 | -2.1323747 |
| C  | -5.8292241 | 1.1064892  | -2.7895478 |
| H  | -6.0768324 | -0.8949271 | -3.6153934 |
| H  | -6.3670020 | -0.7874095 | -1.8753885 |
| H  | -6.8736907 | 1.4190129  | -2.9900440 |
| H  | -5.2227501 | 1.4852754  | -3.6451106 |
| Li | -1.1566563 | 1.3643917  | -1.2970318 |
| H  | 0.7207070  | -2.5938204 | -2.1748389 |
| H  | -5.2865252 | 2.8911579  | -1.5837422 |

|    |            |            |            |
|----|------------|------------|------------|
| C  | -7.9105112 | 2.6286309  | -0.7702899 |
| C  | -6.8841766 | 1.6746246  | -0.3022603 |
| C  | -7.4655193 | 3.9883415  | 1.1987746  |
| C  | -7.7753430 | 5.1709271  | 1.8925325  |
| C  | -6.5400207 | 3.0551891  | 1.7389129  |
| C  | -7.1537279 | 5.4259787  | 3.1205735  |
| H  | -8.4959558 | 5.8722697  | 1.4489077  |
| C  | -5.9211011 | 3.3371836  | 2.9825751  |
| C  | -6.2242431 | 4.5132550  | 3.6682118  |
| H  | -7.3937425 | 6.3533907  | 3.6623577  |
| H  | -5.2034027 | 2.6057698  | 3.3813010  |
| H  | -5.7413972 | 4.7319045  | 4.6317161  |
| H  | -4.7713989 | 0.7924936  | 0.4078601  |
| H  | -7.0920635 | 0.6393903  | -0.6096918 |
| O  | -8.0819349 | 3.7917586  | -0.0073516 |
| O  | -5.3818916 | 0.9856330  | 1.3597144  |
| C  | -6.2824914 | 1.8452403  | 0.9839208  |
| O  | -8.5807357 | 2.5108129  | -1.7736472 |
| Br | 3.9723173  | -2.4227158 | -0.0440139 |
| Br | 5.6780387  | -0.3670564 | 1.8971503  |
| Br | 5.2136249  | 2.9014516  | 1.6617304  |
| Br | 2.9653088  | 4.1033002  | -0.4245117 |

**TS 14f** pro (S)

E(SCF+ZPE)=-12953.2546479  $v_i=1043$

|   |           |           |            |
|---|-----------|-----------|------------|
| C | 1.0824617 | 2.0084639 | -0.7983011 |
| H | 0.1753909 | 2.5477104 | -0.4752004 |
| C | 1.7218828 | 1.3331864 | 0.4499719  |
| H | 2.5814652 | 0.7131046 | 0.1233767  |
| C | 2.0017340 | 3.0394576 | -1.4465384 |
| C | 3.3842097 | 2.8121369 | -1.6366938 |
| C | 1.4514487 | 4.2369322 | -1.9451349 |
| C | 4.1886358 | 3.7518722 | -2.2879182 |
| H | 3.8542064 | 1.8878065 | -1.2661325 |
| C | 2.2471132 | 5.1911243 | -2.5997840 |
| H | 0.3693783 | 4.4092376 | -1.8334666 |
| C | 3.6274396 | 4.9543614 | -2.7739685 |
| H | 5.2656382 | 3.5821738 | -2.4320217 |
| H | 1.7781553 | 6.1113629 | -2.9734216 |
| C | 2.2404880 | 2.3499616 | 1.4711929  |
| C | 1.5205341 | 3.5171766 | 1.8021015  |
| C | 3.4288383 | 2.0817378 | 2.1882928  |
| C | 1.9624383 | 4.3928666 | 2.8113229  |
| H | 0.6038127 | 3.7916023 | 1.2515340  |
| C | 3.8849476 | 2.9455384 | 3.1866121  |
| H | 4.0090465 | 1.1740603 | 1.9572128  |
| C | 3.1547980 | 4.1120211 | 3.5114862  |
| H | 1.3758971 | 5.2965402 | 3.0250468  |
| H | 4.8140164 | 2.7409204 | 3.7386379  |
| N | 0.7224700 | 0.5215156 | 1.1782069  |
| N | 0.6510119 | 1.0459298 | -1.8515301 |

|    |            |            |            |
|----|------------|------------|------------|
| O  | 4.4906736  | 5.8108783  | -3.3904672 |
| O  | 3.6772405  | 4.8908116  | 4.4977428  |
| C  | 2.9958494  | 6.0830376  | 4.8567400  |
| H  | 3.5923238  | 6.5513337  | 5.6608654  |
| H  | 2.9218660  | 6.7909505  | 4.0016541  |
| H  | 1.9719440  | 5.8758831  | 5.2403924  |
| C  | 3.9823144  | 7.0293212  | -3.9089789 |
| H  | 4.8416099  | 7.5570137  | -4.3623414 |
| H  | 3.2098511  | 6.8574488  | -4.6912568 |
| H  | 3.5451143  | 7.6702005  | -3.1107886 |
| C  | -0.6562845 | 0.7803104  | -2.2807137 |
| O  | -0.9379228 | 0.7416089  | -3.4695478 |
| C  | -1.6636092 | 0.1547975  | -1.2958458 |
| C  | -2.5773170 | 0.8565389  | -0.4764853 |
| C  | -1.7607531 | -1.2613359 | -1.3538490 |
| C  | -3.5151402 | 0.1571685  | 0.3211051  |
| C  | -2.7418144 | -1.9630679 | -0.6187145 |
| C  | -3.6242088 | -1.2505767 | 0.2309809  |
| S  | -2.4849965 | 2.7142309  | -0.4033697 |
| O  | -3.8554149 | 3.2525648  | -0.4401947 |
| O  | -1.7790146 | 2.9178426  | 0.9527278  |
| O  | -1.5968184 | 3.0794080  | -1.5479401 |
| C  | 0.8022257  | -0.7762055 | 1.2468884  |
| C  | 1.7744399  | -1.6003756 | 0.4818738  |
| C  | -0.1897856 | -1.5042884 | 2.1370613  |
| C  | 1.7793722  | -3.0350789 | 0.6023281  |
| H  | 1.9772891  | -1.2180440 | -0.5346388 |
| C  | 0.3455323  | -2.8406028 | 2.6717789  |
| C  | 0.8146627  | -3.7381916 | 1.5229373  |
| H  | -0.0577986 | -4.0145196 | 0.8826316  |
| H  | 1.2349844  | -4.6987635 | 1.8870047  |
| Li | -0.6331943 | 1.8543587  | 1.8628728  |
| H  | 1.2104549  | 1.1817487  | -2.7038916 |
| C  | 3.6586590  | -3.5193646 | 1.6090960  |
| C  | 4.5007904  | -2.5677783 | 0.9734742  |
| C  | 3.8752063  | -4.9607401 | 1.4474046  |
| C  | 5.5061598  | -3.0428156 | 0.0319952  |
| C  | 6.3533912  | -2.1715563 | -0.6943870 |
| C  | 5.6391866  | -4.4449903 | -0.1476590 |
| C  | 7.3099617  | -2.6856588 | -1.5710813 |
| H  | 6.2339859  | -1.0890022 | -0.5427370 |
| C  | 6.6055534  | -4.9645223 | -1.0278853 |
| C  | 7.4332672  | -4.0835682 | -1.7332876 |
| H  | 7.9664725  | -2.0064342 | -2.1342741 |
| H  | 6.6831271  | -6.0545908 | -1.1444527 |
| H  | 8.1878382  | -4.4903220 | -2.4235302 |
| O  | 4.8402488  | -5.3455055 | 0.5029334  |
| O  | 3.2697121  | -5.8425437 | 2.0225114  |
| O  | 4.2416323  | -1.3048441 | 1.1185515  |
| H  | 3.0269654  | -1.2673932 | 0.9652814  |
| H  | 2.0645177  | -3.5961294 | -0.3021679 |

|    |            |            |            |
|----|------------|------------|------------|
| H  | 3.1816352  | -3.2345441 | 2.5561633  |
| H  | 1.1846540  | -2.6559868 | 3.3798660  |
| H  | -0.4411397 | -3.3552859 | 3.2583271  |
| H  | -0.5044820 | -0.8352417 | 2.9639844  |
| H  | -1.0988573 | -1.7013919 | 1.5257380  |
| Br | -0.5548771 | -2.2489576 | -2.4569590 |
| Br | -2.8704135 | -3.8541490 | -0.7407324 |
| Br | -4.9186702 | -2.1880764 | 1.2529395  |
| Br | -4.6086765 | 1.0767401  | 1.5766821  |

### TS 14g pro (S)

E(SCF+ZPE)=-12953.2767354  $\nu_i=865$

|   |            |            |            |
|---|------------|------------|------------|
| C | 1.3736375  | -0.5070067 | 0.1695812  |
| H | 0.9420202  | 0.4237964  | -0.2493460 |
| C | 2.1152099  | -0.1198642 | 1.5009553  |
| H | 2.7665326  | -0.9858950 | 1.7671118  |
| C | 2.3566936  | -1.0812484 | -0.8425167 |
| C | 2.9627052  | -2.3436847 | -0.6483334 |
| C | 2.7042218  | -0.3552984 | -1.9940062 |
| C | 3.8784560  | -2.8578171 | -1.5681812 |
| H | 2.7023609  | -2.9540659 | 0.2320692  |
| C | 3.6205461  | -0.8562085 | -2.9343288 |
| H | 2.2476384  | 0.6315949  | -2.1692064 |
| C | 4.2152992  | -2.1175137 | -2.7253096 |
| H | 4.3455876  | -3.8429665 | -1.4241093 |
| H | 3.8559313  | -0.2573600 | -3.8241428 |
| C | 3.0236021  | 1.0874620  | 1.2748240  |
| C | 2.4717531  | 2.3569569  | 1.0049040  |
| C | 4.4297180  | 0.9666644  | 1.3199510  |
| C | 3.2932904  | 3.4766426  | 0.7946211  |
| H | 1.3781557  | 2.4822398  | 0.9422253  |
| C | 5.2602631  | 2.0718861  | 1.1093015  |
| H | 4.8861776  | -0.0178614 | 1.5112181  |
| C | 4.6982284  | 3.3414374  | 0.8475894  |
| H | 2.8246716  | 4.4473092  | 0.5835479  |
| H | 6.3556980  | 1.9789698  | 1.1375419  |
| N | 1.1367619  | 0.1275200  | 2.5709886  |
| N | 0.2349074  | -1.3896826 | 0.4921663  |
| O | 5.1095550  | -2.7030110 | -3.5698352 |
| O | 5.5828923  | 4.3606941  | 0.6587244  |
| C | 5.0768647  | 5.6568026  | 0.3809361  |
| H | 5.9569696  | 6.3154512  | 0.2635309  |
| H | 4.4819571  | 5.6776241  | -0.5591880 |
| H | 4.4456370  | 6.0431708  | 1.2121945  |
| C | 5.4625306  | -2.0208941 | -4.7625417 |
| H | 6.1796373  | -2.6736075 | -5.2934580 |
| H | 4.5791962  | -1.8466720 | -5.4162827 |
| H | 5.9519839  | -1.0433594 | -4.5526432 |
| C | -0.8514160 | -1.7263654 | -0.3227296 |
| O | -1.5598435 | -2.6870219 | -0.0753858 |
| C | -1.0570895 | -0.8721302 | -1.5817159 |

|    |            |            |            |
|----|------------|------------|------------|
| C  | -1.6127281 | 0.4307265  | -1.5785671 |
| C  | -0.6963490 | -1.4660848 | -2.8149318 |
| C  | -1.6817479 | 1.1743111  | -2.7807650 |
| C  | -0.8565445 | -0.7667645 | -4.0329888 |
| C  | -1.3313730 | 0.5665910  | -4.0128913 |
| S  | -2.1920327 | 1.1706122  | 0.0262747  |
| O  | -2.4156787 | -0.0187583 | 0.9468327  |
| O  | -0.9524135 | 1.8995276  | 0.5496758  |
| O  | -3.3877205 | 1.9815867  | -0.2489889 |
| C  | 1.4839103  | 0.0799262  | 3.8307296  |
| C  | 0.4578035  | 0.4104224  | 4.8350550  |
| C  | 2.8842921  | -0.2479635 | 4.3152285  |
| C  | 0.7739979  | 0.6015677  | 6.2325084  |
| H  | -0.3858719 | 1.0059253  | 4.4406639  |
| C  | 2.9814856  | -0.5467671 | 5.8182893  |
| C  | 2.2268763  | 0.4872748  | 6.6587699  |
| H  | 2.6804515  | 1.4958022  | 6.5160933  |
| H  | 2.3015879  | 0.2663869  | 7.7429503  |
| Li | -0.7021209 | 0.3602901  | 1.8096946  |
| H  | 0.4031813  | -2.1296437 | 1.1843174  |
| C  | -0.0729347 | -0.9215256 | 7.2890663  |
| C  | -1.2870429 | -1.1510076 | 6.5692996  |
| C  | -0.1190624 | -0.5382211 | 8.7141305  |
| C  | -2.5570249 | -0.8214329 | 7.1853571  |
| C  | -3.7980621 | -0.9426090 | 6.5105507  |
| C  | -2.5404640 | -0.3667730 | 8.5316263  |
| C  | -4.9875598 | -0.6253282 | 7.1671018  |
| H  | -3.7907847 | -1.2898749 | 5.4672029  |
| C  | -3.7394080 | -0.0531162 | 9.1945439  |
| C  | -4.9536951 | -0.1841435 | 8.5092674  |
| H  | -5.9490853 | -0.7174445 | 6.6416728  |
| H  | -3.6941717 | 0.2942165  | 10.2362062 |
| H  | -5.8924974 | 0.0638123  | 9.0272421  |
| O  | -1.3756324 | -0.2036641 | 9.2345136  |
| O  | 0.8382438  | -0.4482564 | 9.4540729  |
| O  | -1.2018178 | -1.4843179 | 5.3159131  |
| H  | -0.3534633 | -0.8159467 | 4.9172433  |
| H  | 0.2043062  | 1.3970530  | 6.7411843  |
| H  | 0.7680187  | -1.5888627 | 7.0514537  |
| H  | 3.3038628  | -1.0870067 | 3.7210711  |
| H  | 3.5192547  | 0.6286731  | 4.0521878  |
| H  | 4.0458703  | -0.5868014 | 6.1245579  |
| H  | 2.5736772  | -1.5621431 | 6.0240347  |
| Br | -2.1593191 | 3.0117913  | -2.7802535 |
| Br | -1.4901876 | 1.5315727  | -5.6380821 |
| Br | -0.4176220 | -1.5984835 | -5.6782722 |
| Br | 0.0229259  | -3.2275341 | -2.8360639 |

**TS 14h pro (R)**

E(SCF+ZPE)=-12953.24875  $v_i=826$

|   |           |           |            |
|---|-----------|-----------|------------|
| C | 0.3303679 | 2.4525980 | -0.8476142 |
|---|-----------|-----------|------------|

|   |            |            |            |
|---|------------|------------|------------|
| H | -0.7128433 | 2.7450842  | -0.6333901 |
| C | 0.9975487  | 2.0026784  | 0.4877604  |
| H | 2.0160765  | 1.6315658  | 0.2510672  |
| C | 1.0099872  | 3.6694594  | -1.4679381 |
| C | 2.4160900  | 3.7828266  | -1.5655032 |
| C | 0.2221689  | 4.6850962  | -2.0437381 |
| C | 3.0122446  | 4.8760360  | -2.2008624 |
| H | 3.0696142  | 3.0055676  | -1.1390350 |
| C | 0.8060774  | 5.7904232  | -2.6836865 |
| H | -0.8739118 | 4.5867882  | -2.0117343 |
| C | 2.2109791  | 5.8939749  | -2.7651602 |
| H | 4.1054763  | 4.9695504  | -2.2755459 |
| H | 0.1540789  | 6.5584253  | -3.1213276 |
| C | 1.1155923  | 3.1508877  | 1.4901112  |
| C | 0.0207271  | 3.9921683  | 1.7821028  |
| C | 2.3143039  | 3.3645987  | 2.2062129  |
| C | 0.1063108  | 5.0003408  | 2.7581364  |
| H | -0.9279300 | 3.9028557  | 1.2233891  |
| C | 2.4194375  | 4.3653091  | 3.1759121  |
| H | 3.1963775  | 2.7410398  | 1.9893311  |
| C | 1.3111241  | 5.1925131  | 3.4669459  |
| H | -0.7689710 | 5.6373589  | 2.9431435  |
| H | 3.3572884  | 4.5351551  | 3.7246108  |
| N | 0.1766532  | 0.9440839  | 1.1129905  |
| N | 0.2781050  | 1.3848149  | -1.8776646 |
| O | 2.8808676  | 6.9201202  | -3.3635410 |
| O | 1.5042311  | 6.1376728  | 4.4282153  |
| C | 0.4277451  | 7.0017110  | 4.7584840  |
| H | 0.8019807  | 7.6750335  | 5.5512941  |
| H | 0.1054032  | 7.6143356  | 3.8872636  |
| H | -0.4508568 | 6.4398749  | 5.1471775  |
| C | 2.1276026  | 7.9619083  | -3.9622264 |
| H | 2.8611504  | 8.6730177  | -4.3849290 |
| H | 1.4760906  | 7.5852144  | -4.7820676 |
| H | 1.4936670  | 8.4962660  | -3.2195768 |
| C | -0.8273171 | 0.6993096  | -2.3654492 |
| O | -0.9463497 | 0.4328906  | -3.5546261 |
| C | -1.7563033 | -0.0628487 | -1.3979324 |
| C | -2.9793826 | 0.4162814  | -0.8700923 |
| C | -1.4302990 | -1.4310963 | -1.2069947 |
| C | -3.8308501 | -0.4446444 | -0.1337836 |
| C | -2.3011877 | -2.3116692 | -0.5308377 |
| C | -3.5160061 | -1.8184368 | 0.0054364  |
| S | -3.3416742 | 2.2453055  | -0.9843011 |
| O | -4.7784739 | 2.4523197  | -1.2301494 |
| O | -2.8850087 | 2.6651732  | 0.4325921  |
| O | -2.4072080 | 2.7430904  | -2.0361916 |
| C | 0.7199629  | -0.1462339 | 1.5933162  |
| C | 2.1537746  | -0.4491287 | 1.6425289  |
| C | -0.1950273 | -1.1909197 | 2.2048561  |
| C | 2.6526118  | -1.6287650 | 2.3299329  |



```

C 0.3918403 -1.7275671 3.5185194
C 1.7307355 -2.4345068 3.2590777
Li -1.6961540 1.6342146 1.3566859
H 0.8779218 1.6103413 -2.6811423
C 3.1625810 -2.9513051 0.9309643
C 3.9369245 -2.1290280 0.0490162
C 3.7938781 -4.1237405 1.5710533
C 5.3741376 -2.2936201 -0.0089054
C 6.2184385 -1.4627692 -0.7884596
C 5.9499946 -3.3451917 0.7544803
C 7.5963236 -1.6782849 -0.8054974
H 5.7545921 -0.6550753 -1.3728550
C 7.3388263 -3.5636687 0.7344726
C 8.1521143 -2.7303572 -0.0426357
H 8.2491595 -1.0332841 -1.4113427
H 7.7536411 -4.3859146 1.3342260
H 9.2391287 -2.9015470 -0.0567526
O 5.1969741 -4.1782337 1.5353502
O 3.2127300 -5.0097360 2.1581027
O 3.3413433 -1.1346484 -0.5392368
H 2.5894624 -0.7645468 0.2271442
H 0.5322071 -0.8835938 4.2281665
H -0.3155263 -2.4346153 3.9969921
H 2.2689760 -2.6097657 4.2125730
H 1.5436264 -3.4500773 2.8528858
H -1.2073842 -0.7626920 2.3522387
H -0.3191608 -2.0310438 1.4845257
H 3.6702261 -1.4945990 2.7333299
H 2.1229112 -3.1435847 0.6239411
H 2.8345382 0.4165330 1.6409768
Br -5.3902337 0.2186847 0.7309862
Br -4.6904997 -2.9931919 0.9213210
Br -1.8402741 -4.1402777 -0.3087924
Br 0.2364130 -2.0914241 -1.8592261

```

Single-point energies with solvent correction employing COSMO as implemented in TURBOMOLE 6.3. Settings were applied as default with epsilon=7.25 for THF. Radii were optimized.

| <b>Stationary point</b> | <b>Total energy COSMO-TPSS/SVP//TPSS/SVP [kcal/mol]</b> | <b>Relative energy [kcal/mol]</b> |
|-------------------------|---------------------------------------------------------|-----------------------------------|
| <b>TS 14 a</b>          | -12952.64965                                            | 0.3                               |
| <b>TS 14 b</b>          | -12952.64769                                            | 1.5                               |
| <b>TS 14 c</b>          | -12952.64214                                            | 5.0                               |
| <b>TS 14 d</b>          | -12952.65015                                            | 0.0                               |

|                         |                                                                  |                                       |
|-------------------------|------------------------------------------------------------------|---------------------------------------|
| <b>TS 14 e</b>          | -12952.63241                                                     | 11.1                                  |
| <b>TS 14 f</b>          | -12952.62943                                                     | 13.0                                  |
| <b>TS 14 g</b>          | -12952.64859                                                     | 1.0                                   |
| <b>TS 14 h</b>          | -12952.62333                                                     | 16.8                                  |
| <b>Stationary point</b> | <b>Total energy COSMO-<br/>BP86/SVP//BP86/SVP<br/>[kcal/mol]</b> | <b>Relative energy<br/>[kcal/mol]</b> |
| <b>12</b>               | -1969.34240                                                      | 0.0                                   |
| <b>13</b>               | -1969.27485                                                      | 42.4                                  |
| <b>14</b>               | -1969.28531                                                      | 35.8                                  |
| <b>15</b>               | -1969.32593                                                      | 10.3                                  |
| <b>16</b>               | -1969.33962                                                      | 1.7                                   |
